1 **DNA methylation in transposable elements disrupts the connection**  
2 **between three-dimensional chromatin organization and gene**  
3 **expression upon rice genome duplication**

4  
5 Zhenfei Sun<sup>1,5</sup>, Yunlong Wang<sup>2,5</sup>, Zhaojian Song<sup>3,5</sup>, Hui Zhang<sup>4</sup>, Min Ma<sup>1</sup>, Pan  
6 Wang<sup>1</sup>, Yaping Fang<sup>2</sup>, Detian Cai<sup>3\*</sup>, Guoliang Li<sup>2\*</sup> and Yuda Fang<sup>1\*</sup>

7  
8 <sup>1</sup>Joint Center for Single Cell Biology, School of Agriculture and Biology, Shanghai Jiao  
9 Tong University, Shanghai 200240, China; <sup>2</sup>National Key Laboratory of Crop Genetic  
10 Improvement, Hubei Key Laboratory of Agricultural Bioinformatics, College of Informatics,  
11 Huazhong Agricultural University, Wuhan, 430070, China; <sup>3</sup>School of Life Science, Hubei  
12 University, Wuhan 430062, China; <sup>4</sup>CAS Center for Excellence in Molecular Plant  
13 Sciences, Institute of Plant Physiology and Ecology, Chinese Academy of Sciences,  
14 Shanghai 200032, China

15 <sup>5</sup>Contribute equally

16 \*Address correspondence to [yuda.fang@sjtu.edu.cn](mailto:yuda.fang@sjtu.edu.cn); [guoliang.li@mail.hzau.edu.cn](mailto:guoliang.li@mail.hzau.edu.cn); or  
17 [dtcai8866@163.com](mailto:dtcai8866@163.com)

18 **Short title:** TE methylation affects the function of 3D genome

19 The author responsible for distribution of materials integral to the findings presented in this  
20 article in accordance with the policy described in the Instructions for Authors  
21 (<https://academic.oup.com/plcell/pages/General-Instructions>) is : Yuda Fang  
22 ([yuda.fang@sjtu.edu.cn](mailto:yuda.fang@sjtu.edu.cn))

23 **Abstract**

24 Polyploidy serves as a major force in plant evolution and domestication of  
25 cultivated crops. However, the relationship and underlying mechanism  
26 between three-dimensional (3D) chromatin organization and gene expression  
27 upon rice genome duplication is largely unknown. Here we compared the 3D  
28 chromatin structures between diploid (2C) and autotetraploid (4C) rice by  
29 high-throughput chromosome conformation capture analysis, and found that  
30 4C rice presents weakened intra-chromosomal interactions compared to its 2C  
31 progenitor. Moreover, we found that changes of 3D chromatin organizations  
32 including chromatin compartments, topologically associating domain (TAD)  
33 and loops uncouple from gene expression. Moreover, DNA methylations in the  
34 regulatory sequences of genes in compartment A/B switched regions and TAD  
35 boundaries are not related to their expressions. Importantly, in contrast to that  
36 there was no significant difference of methylation levels in TEs in promoters of  
37 differentially expressed genes (DEGs) and non-DEGs between 2C and 4C rice,  
38 we found that the hypermethylated transposable elements across genes in  
39 compartment A/B switched regions and TAD boundaries suppress the  
40 expression of these genes. We propose that the rice genome doubling might  
41 modulate TE methylation which results in the disconnection between the  
42 alteration of 3D chromatin structure and gene expression.

43

44 **Key words:** Polyploidy rice; Hi-C; TAD; transposable elements; DNA  
45 methylation

46

47

## 48 **Introduction**

49 Polyploidy plays an important role in the formation of plant new species,  
50 evolution and breeding (Marcussen et al., 2014; Soltis et al., 2015). Polyploidy  
51 plant is often accompanied by powerful biological potentials, improved  
52 environmental adaptation, elevated biomass and yield (Chao et al., 2013; Wu  
53 et al., 2014a). It was known that autotetraploid rice shows larger kernels,  
54 higher protein content, better amino acid composition and higher 1,000-grain  
55 weight than its diploid counterpart (Wu et al., 2014b). Autotetraploid  
56 *Arabidopsis* exhibits obvious phenotypes at both vegetative and reproductive  
57 stages, including large leaves, increased whole plant size, late flowering and  
58 large seeds (Zhang et al., 2019). Autotetraploid birch is superior in volume,  
59 leaf, breast-height diameter, fruit and stoma, and inferior in height compared to  
60 diploid birch (Mu et al., 2012). At the cellular and molecular levels,  
61 polyploidization often leads to changed chromatin structures and gene  
62 expression (Chen and Ni, 2006; Zhang et al., 2019; Concia et al., 2020).

63 Chromatin is organized in a highly ordered three-dimensional (3D)  
64 architecture instead of as a linear nucleotide sequence of the genome  
65 (Meaburn and Misteli, 2007; Lieberman-Aiden et al., 2009). The 3D genome is  
66 packed in the nucleus in a hierarchical pattern. Chromosome territory (CT) at  
67 the several megabase-scale is a higher level of chromatin domain (Cremer et  
68 al., 2006; Cremer and Cremer, 2010; Gibcus and Dekker, 2013). Chromatin in  
69 CT is divided into two types of compartments, A and B. Compartment A is  
70 associated with open chromatin and active transcription, and compartment B  
71 with closed chromatin and inactive transcription (Lieberman-Aiden et al., 2009).  
72 Topologically associating domain (TAD) is a predominant structural feature in  
73 most organisms (Wang et al., 2015). TADs often represent functional domains,  
74 as a given TAD contains the regulatory elements for the genes inside the same  
75 TAD (de Laat and Duboule, 2013). Therefore, the integrity of the TAD structure  
76 is necessary for gene regulation (Ibn-Salem et al., 2014; Lupianez et al., 2015).

77 The location of TAD boundary is strongly related to the local gene expression,  
78 epigenetic landscape and the binding of various insulator proteins (Dixon et al.,  
79 2012; Filippova et al., 2014). Chromatin loops which appear at 10 kb to 1 Mb  
80 (Fraser, 2006; Phillips and Corces, 2009) function in transcription, replication  
81 and recombination (Mukherjee and Mukherjea, 1988).

82 It has been known that the alterations of chromatin structures are coupled  
83 with the changes of gene expressions in some biological progresses (Ouyang  
84 et al., 2020). For example, in *Arabidopsis*, the switches of compartment A/B  
85 lead to the change of transcription during the genome doubling (Zhang et al.,  
86 2019). In rice, higher-order chromatin architecture is correlated with  
87 transcriptional regulation under heat stress (Liang et al., 2021). In cotton, the  
88 changes of TADs affect the transcriptional activities of abundant genes in  
89 tetraploid compared to diploid cotton (Wang et al., 2018). While other reports  
90 have also shown that three-dimensional structural changes are unrelated with  
91 gene expression. For example, the uncoupling relationship between genome  
92 topology and gene expression was observed in highly rearranged  
93 chromosomes (balancers) spanning ~75% of *Drosophila* genome (Ghavi-Helm  
94 et al., 2019). Most TAD disruptions do not result in marked changes of gene  
95 expression in human cancer (Akdemir et al., 2020). Recently, chromatin  
96 structure and the regulation of gene expression were found to be independent  
97 during development of *Drosophila* (Espinola et al., 2021; Ing-Simmons et al.,  
98 2021). However, the mechanism of both correlation and uncorrelation between  
99 3D chromatin structure and gene expression has not been revealed.

100 Polyploidy events trigger a large number of epigenetic and transcriptional  
101 changes in the replicated or merged genome (Seoighe and Gehring, 2004;  
102 Paun et al., 2011; Roulin et al., 2013; Becak, 2014; Diez et al., 2014). In  
103 addition to the 3D genomic organization, another important epigenetic factor is  
104 DNA methylation at cytosine residues which is associated with gene  
105 transcription by affecting the binding of chromatin proteins including  
106 transcription factors (TFs) to DNA (Moore et al., 2013). The precise regulation

107 of DNA methylation is essential for plant and animal developments (Luo et al.,  
108 2013; Smith and Meissner, 2013; Kawashima and Berger, 2014). In plants, in  
109 addition to CG context, DNA methylation also occurs in sequence contexts of  
110 CHG and CHH with which siRNAs are mainly associated (Feng et al., 2010;  
111 Zemach et al., 2010; Feng and Jacobsen, 2011). The majority of DNA  
112 methylation is found in transposable elements (TEs) with CG, CHG and CHH  
113 contexts to suppress the activities of TEs. Substantial methylation is found in  
114 the bodies of active genes, in which generally occurs in the CG context (Law  
115 and Jacobsen, 2010). DNA methylation in regulatory sequences, such as  
116 promoters and enhancers, often leads to gene silencing (Jones, 2012;  
117 Schubeler, 2015; Zhang et al., 2018a).

118 In this study, we found that the changes of 3D chromatin structures are  
119 not related to the transcriptional changes when diploid (2C) rice is duplicated  
120 to autotetraploid (4C) rice. In addition, DNA methylation in the regulatory  
121 regions of genes in the compartment A/B switched regions or TAD boundaries  
122 are not important for their differential regulations of transcription between 2C  
123 and 4C rice. By comparing the methylations of TEs adjacent to genes in the  
124 compartment A/B switched regions or TAD boundaries and differentially  
125 expressed genes (DEGs) between 2C and 4C rice, we revealed that the  
126 elevated methylation in TEs adjacent to genes in the compartment A/B  
127 switched regions or TAD boundaries suppresses the transcription of these  
128 genes upon rice genome duplication.

129

## 130 **Results**

### 131 **The changes of phenotypes and gene expression upon rice** 132 **whole-genome duplication**

133 The diploid (2×9311, 2C) and autotetraploid rice (4×9311, 4C) were confirmed  
134 by flow cytometry (Supplemental Figure S1). Compared to 2C rice, 4C rice  
135 seedlings show no obvious changes of plant height, flag leaf width, and plant  
136 weight (Figure 1A-D) with decreased tillering number and increased flag leaf

---

137 length, 1,000-grain weight, number of effective panicles per plant, grain length,  
138 and grain width (Figure 1E-J), similar to the phenotypes of autotetraploid rice  
139 *Oryza sativa ssp. indica* cv. *Aijiaonante* previously reported (Zhang et al.,  
140 2015). In addition, the nuclei in leaf and root cells of 4C rice are larger than  
141 those of 2C rice (Figure 1K-N).

142 To evaluate the impact of rice genome doubling on transcription, we  
143 compared the transcriptomes of the above ground parts between 10 day-old  
144 2C and 4C seedlings by RNA-sequencing. The results indicate that the  
145 predominant part of genes is not changed obviously. Among 698 genes  
146 significantly regulated, 510 genes are up-regulated and 188 are  
147 down-regulated (Figure 1O-P; Supplemental Data Set S1). Gene ontology (GO)  
148 analysis indicate that these DEGs associate with a variety of biosynthetic and  
149 metabolic processes (Supplemental Figure S2; Supplemental Data Set S2).

150

### 151 **Intra-chromosomal interactions are weakened in autotetraploid rice**

152 To test whether chromatin organization is rearranged after rice genome  
153 duplication or not, we performed Hi-C experiments to map the chromatin  
154 interactions. More than 843 million and 842 million raw Hi-C reads from 2C and  
155 4C rice were obtained (Supplemental Data Set S3), respectively, with a high  
156 reproducibility between the two biological replicates of 2C or 4C rice  
157 (Supplemental Figure S3A and 3B). We then calculated relative interaction  
158 difference between 2C and 4C rice. The results showed that 4C rice shows  
159 slightly increased inter-chromosomal interactions and dampened  
160 intra-chromosomal interactions (Figure 2A-2D). We also observed decreased  
161 inter- or intra-chromosome arm interactions in most of chromosomes in 4C rice  
162 compared to 2C rice (Figure 2E and 2F).

163 To quantitatively assess the chromatin contacts, we calculated  
164 interaction decay exponents (IDEs), which characterize chromatin packing as  
165 the slopes of a linear fit of average interaction intensities detected at a given  
166 range of genomic distances in the logarithm scale (Grob et al., 2014). The

---

167 results displayed that IDEs of intra-chromosomes (Figure 2D; Supplemental  
168 Figure S4), inter-chromosome arms (Figure 2G), intra-chromosome arms  
169 (Figure 2H) in 4C rice are slightly lower than those in 2C rice.

170

171 **The switches between chromatin compartment A and B upon rice**  
172 **genome doubling are not related to transcriptional regulation**

173 To know whether the chromatin compartment change is associated with the  
174 alteration of gene expression during rice genome duplication, we used first  
175 principal component of the Pearson's matrix in Hi-C data and gene expression  
176 to define the active (A) and inactive (B) chromatin compartments in 2C and 4C  
177 rice. Compartments A and B were compared through the first principal  
178 component at a 50 kb resolution between 2C and 4C rice. The results indicate  
179 that 47.31% and 50.3% of the genome show conserved compartments A and B  
180 between 2C and 4C rice, respectively (Figure 3A). We found that rice genome  
181 doubling induces switches between compartment A and B (Figure 3A and 3B)  
182 with 1% compartments converted from A to B, and 1.39% converted from B to  
183 A (Figure 3A). However, we found that the numbers of expressed genes in  
184 either conserved compartments (A to A, or B to B) or switched compartments  
185 (B to A, or A to B) are of no significant difference between 4C and 2C rice  
186 (Figure 3B).

187 We further analyzed the correlation between chromatin compartment  
188 switches and transcription. We found that only 24 DEGs (24/698, about 3.4%)  
189 overlapped with switched regions between compartments A and B (Figure 3C  
190 and 3D). To know the confidence of the result, we performed bootstrapping  
191 randomized analysis. We randomly selected 10000 group of equal number  
192 (698) of genes to determine the percentage of those genes overlapped with  
193 A/B switched regions. The result showed that 7.24% of the randomly selected  
194 groups had more genes than the DEGs overlapped with the switched A/B  
195 compartments (Figure 3E), indicating that the overlap of DEGs with the  
196 switched A/B compartments is not statistically significant. It means that



---

197 chromatin compartment switches after rice genome duplication is not related to  
198 transcription.

199

200 **The differential TAD boundaries and loops are not important for the**  
201 **transcriptional regulation upon rice genome doubling**

202 To know if TAD changes (TADs to non-TAD regions, or non-TADs to TAD  
203 regions, are called TAD changes) after rice genome duplication are related to  
204 transcription, we first identified TADs by a modified ‘TADcompare’ algorithm  
205 (Cresswell and Dozmorov, 2020). 2688 and 2759 TADs were defined in 2C  
206 and 4C rice with a median size of 150 kb, respectively (Supplemental Figure  
207 S5A). We then categorized and created 5 group TADs with each group having  
208 an equal number of TADs. The 5 group TADs were arranged according to gene  
209 content with the gene-poorest bin encompasses less than 8 % of all genes  
210 while the gene-richest group carries over 50 % of all genes (Figure 4A and 4B).

211 In addition to TADs, we defined the 5 kb regions adjacent to TADs as TAD  
212 boundaries, and other regions as non-TADs, given that the TAD structures  
213 were calculated at a 10 kb resolution. In both 2C and 4C rice, the overall  
214 protein-coding gene density in TAD regions of 4C rice was similar to that of 2C  
215 rice (Supplemental Figure S5B), and the overall protein-coding gene density in  
216 non-TAD regions of 4C rice was slightly higher than that of 2C rice near TAD  
217 boundaries (Supplemental Figure S5C). The relative locations of non-DEGs  
218 altered in 2C rice compared to 4C rice in both TADs and non-TADs (Figure 4C  
219 and 4D). In contrast, the relative locations of DEGs in both TADs and  
220 non-TADs in 4C rice are similar to those in 2C rice (Figure 4E and 4F),  
221 indicating that the changes of TADs during rice genome duplication affect the  
222 relative locations of some non-DEGs, but did not cause significant differential  
223 expression. Among 698 DEGs in total, 628 locate in TADs of 2C rice and 652  
224 in TADs of 4C rice (Supplemental Figure S6). Only a small portion of DEGs  
225 (68/698, about 9.76%) localizes in TAD changed regions between 2C and 4C  
226 rice genome (Figure 4G and Supplemental Data Set S4). We then performed



---

227 bootstrapping randomized analysis. We randomly selected 10000 group of  
228 equal number (698) of DEGs to determine the percentage of those genes  
229 overlapped with TAD changed genes, the result showed that the percentage of  
230 DEGs (9%) localized in the percentage of randomly selected control genes  
231 (~12%) (Figure 4H), indicating that the changed TAD boundaries after rice  
232 genome duplication is not related to transcription.

233 To know whether loop changes after rice genome duplication are related  
234 to transcriptional regulation, we first annotated 4822 loops in 2C rice and 5365  
235 loops in 4C rice and identified 79 loops specific for 2C rice and 81 loops  
236 specific for 4C rice (Supplemental Figure S5D and 5E; Supplemental Data Set  
237 S5). We found that FPKMs of genes in loops or non-loops between 2C and 4C  
238 rice are of no significant difference (Figure 4I), and that FPKMs of genes in  
239 specific loops and conservative loops are also of no significant difference in  
240 both 2C and 4C rice (Figure 4J), suggesting that the chromatin loops are not  
241 important for the transcriptional regulation when 2C rice is duplicated to 4C  
242 rice.

243

#### 244 **DNA methylations in the promoter regions of genes in compartment A/B** 245 **switched regions and TAD boundaries are not involved in transcriptional** 246 **regulation upon rice genome duplication**

247 It was known that the global level of DNA methylation increases when 2C  
248 rice is duplicated to 4C rice (Zhang et al., 2015). We analyzed DNA  
249 methylation in different regions of genes and the relationship between DNA  
250 methylation and 3D genomic structures in 2C and 4C rice. The genome-wide  
251 DNA methylation revealed by WGBS-seq (Supplemental Data Set S6) indicate  
252 that the average levels of DNA methylations in CG, CHG and CHH contexts  
253 are increased in 4C rice compared to 2C rice in genes, upstream and  
254 downstream of genes with each gene defined by a continuous exon and intron  
255 sequence (Supplemental Figure S6A). In 2C and 4C rice, 59% and 62.5% of  
256 DNA methylation are in CG context, 29% and 31% in CHG context, and 3.5%

---

257 and 3.5% in CHH context, respectively (Supplemental Figure S6B). Compared  
258 to 2C rice, 4C rice exhibits increased proportions of methylated cytosines in  
259 CG and CHG contexts (Supplemental Figure S6B), and CG methylation level  
260 is higher than CHG and CHH methylations (Supplemental Figure S6B), similar  
261 to the previous report (Zhang et al., 2015).

262 As DNA methylation in the regulatory regions of genes plays an important  
263 role in transcriptional regulation (Zhang et al., 2018b), we compared the DNA  
264 methylation in DEG promoters between 2C and 4C rice. All DEGs and  
265 non-DEGs were classified according to log fold change (LFC) of genes  
266 (Supplemental Figure S7). The results showed that there was no significant  
267 difference of DNA methylation levels in DEG promoters between 2C and 4C  
268 rice, and the CG and CHG methylation levels of non-DEG promoters in 2C rice  
269 are lower than those in 4C rice (Supplemental Figure S7).

270 We then analyzed the correlation between DNA methylation in 4 kb  
271 upstream of genes in compartment A/B switched regions and the  
272 transcriptional changes of these genes upon rice genome duplication. We  
273 found that the CG, CHG and CHH methylation levels in 4 kb upstream of all  
274 genes in compartment A/B switched regions are not significantly changed in  
275 4C rice compared to those in 2C rice (Figure 5A). Moreover, DNA methylation  
276 levels in 4 kb upstream of DEGs in compartment A/B switched regions are  
277 similar to those of non-DEGs in both 2C and 4C rice (Figure 5B and 5C).  
278 These results suggested that there is not an obvious link between DNA  
279 methylation in the upstream of genes in compartment A/B switched regions  
280 and the transcriptional regulation of these genes upon rice genome doubling.

281 To know the role of the methylation of TAD boundary genes in the  
282 transcriptional regulation, we compared the methylation level of TAD boundary  
283 genes with that of DEGs upon rice genome doubling. We found that the CG,  
284 CHG and CHH methylation levels in 4 kb upstream of TAD boundary genes  
285 (3247) in 4C rice remain unchanged compared to those (3203) in 2C rice  
286 (Figure 5D; Supplemental Data Set S7). In addition, CG and CHG methylation

---

287 levels in 4 kb upstream of TAD boundary genes do not change significantly  
288 compared to those in 4 kb upstream of DEGs in both 2C and 4C rice (Figure  
289 5D). Moreover, the CHH methylation level in 4 kb upstream of TAD boundary  
290 genes is lower than that of DEGs in both 2C and 4C rice (Figure 5E and 5F). In  
291 contrast, FPKMs of TAD boundary genes are lower than those of DEGs  
292 (Figure 5G), which is opposite to the expectation that FPKMs of the  
293 hypomethylated TAD boundary genes are higher than FPKMs of the  
294 hypermethylated DEGs. We concluded that DNA methylation in the upstream  
295 regions of TAD boundary genes is not involved in transcriptional regulation.

296 We further analyzed the relationships between DEGs and differential  
297 methylation regions (DMRs) which were known to participate in gene  
298 transcription (Schmitz et al., 2011). Totally, 1484 CG, 89 CHG, and 1 CHH  
299 DMRs were identified between 2C and 4C rice, including 892 CG, 26 CHG,  
300 and 1 CHH hypermethylated DMRs, and 592 CG, 63 CHG, and 0 CHH  
301 hypomethylated DMRs. We then examined the genomic distances between  
302 DEGs and DMRs (Becker et al., 2011; Schmitz et al., 2011). The distance  
303 between the TSS locus of each DEG and all DMRs was calculated, and the  
304 shortest distance was taken as the distance between a given DEG and DMRs.  
305 We found that the genomic distances between DEGs and DMRs are very long  
306 (Supplemental Figure S8), suggesting that there are no obvious relationships  
307 between DEGs and DMRs.

308

### 309 **Hypermethylated TEs across non-DEGs in compartment A/B switched** 310 **regions correlate with the inhibited gene transcription upon rice genome** 311 **doubling**

312 Given that the number, distance and methylation level of TEs were known to  
313 affect the expression of genes neighboring the TEs in *Arabidopsis*, rice and  
314 maize (Wang et al., 2013; Zhang et al., 2015; Forestan et al., 2017), we  
315 addressed if DNA methylation in TEs is involved in 3D genome-mediated  
316 transcriptional regulation. In rice 9311 genome, 14.57% of TEs localize in

317 genes, 38.19% in upstream of genes, and 38.33% in downstream of genes.  
318 We compared the methylation levels in CG, CHG, and CHH contexts between  
319 2C and 4C rice for 12 major types of TEs including class I retrotransposons  
320 Copia, Gypsy, LTR, LINE and SINE, and class II transposons Helitron,  
321 Stowaway, DNA, Harbinger, MULE\_MuDR and hAT. The results indicate that  
322 the methylation levels of Copia, DNA, Harbinger, LINE, MULE\_MuDR, and  
323 SINE in 4C rice are different from those in 2C rice (Supplemental Figure S9  
324 and 10). We then compared the methylation levels of TEs in gene promoters  
325 between 2C and 4C rice. The results showed that there was no significant  
326 difference of methylation levels in TEs in promoters of DEGs and non-DEGs  
327 between 2C and 4C rice (Supplemental Figure S11).

328 To analyze the effect of DNA methylation in TEs across genes in  
329 compartment A/B switched regions on gene expression, we compared the  
330 methylation levels of all TEs, Class I and II TEs across non-DEGs with those  
331 across DEGs in compartment A/B switched regions between 2C and 4C rice,  
332 with TEs across a gene defined by TEs in the gene body and 4 kb regions  
333 flanking the gene. The results indicate that all TEs and Class I TEs in non-DEG  
334 bodies show hypermethylation in CG, CHG and CHH contexts (Figure 6A and  
335 6B), and Class II TEs in non-DEG bodies show no change in CG, CHG and  
336 CHH contexts compared to those in DEG bodies in 2C and 4C rice (Figure 6C).  
337 In addition, the results showed that all TEs in 4 kb regions flanking non-DEGs  
338 show hypermethylation in CG context (Figure 6D), Class I TEs show  
339 hypermethylation in CG and CHG contexts (Figure 6E), and Class II TEs show  
340 no change of methylation in CG, CHG and CHH contexts compared to those in  
341 4 kb regions flanking DEGs in 2C and 4C rice (Figure 6C). In contrast, FPKMs  
342 of non-DEGs in compartment A/B switched regions are lower than those of  
343 DEGs in both 2C and 4C rice (Supplemental Figure S12). These results show  
344 that the hypermethylation of TEs across non-DEGs in compartment A/B  
345 switched regions correlates with the suppressed transcription of these genes.

346

---

347 **Hypermethylated CG in TEs across TAD boundary genes correlates with**  
348 **the suppressed gene transcription upon rice genome duplication**

349 As TAD boundary plays an important role in the regulation of local transcription  
350 and epigenetic landscape in different species (Bonev et al., 2017; Yang et al.,  
351 2019; Ouyang et al., 2020), we evaluated the impacts of the methylation levels  
352 of TEs across TAD boundary genes on the role of 3D chromatin structure in  
353 transcriptional regulation. As TEs including Copia, DNA, Harbinger, LINE,  
354 MULE\_MuDR and SINE exhibit differential DNA methylation between 2C and  
355 4C rice (Supplemental Figure S9 and 10), we compared the methylation levels  
356 of these TEs across TAD boundary genes in 2C and 4C rice to those across  
357 DEGs, including the gene bodies and 4 kb regions flanking these genes. The  
358 results indicate that Copia, DNA and MULE-MuDR across TAD boundary  
359 genes show hypermethylation in CG context, no change in CHG context, and  
360 hypomethylation in CHH context compared to those across DEGs in 2C and  
361 4C rice (Figure 7A-7D).

362 To verify the CHH hypomethylation in TEs, we analyzed the clusters of  
363 siRNAs, as siRNAs often mediate CHG and CHH types of methylation in  
364 plants, and 24 nt siRNAs can enter the RdDM pathway to trigger DNA  
365 methylation and transcriptional silencing to suppress TE activities (Matzke and  
366 Mosher, 2014). We investigated the relationship between CHH methylation  
367 level and siRNA abundance in TEs across TAD boundary genes and DEGs.  
368 We gained sRNA length profiles similar to previously reported (Peng et al.,  
369 2011; Zhang et al., 2015) in 2C and 4C rice (Supplemental Figure S13A). In  
370 total, 154,968 siRNA clusters were identified in 2C rice, and 147,589 clusters  
371 in 4C rice. Most siRNA clusters overlapped with class I and class II TEs, and  
372 the cluster fractions in Class I TEs, Class II TEs, genes and intergenic regions  
373 of 4C rice are similar to those of 2C (Supplemental Figure S13B). The lower  
374 CHH methylation level in TEs across TAD boundary genes than that in TEs  
375 across DEGs (Figure 7A-7D) is parallel with the lower siRNA level in TEs  
376 across TAD boundary genes than that in TEs across DEGs (Supplemental

377 Figure S14A-14D).

378 The CG methylation level of TEs across TAD boundary genes is much  
379 higher than those of CHG and CHH methylations in 2C and 4C (Supplemental  
380 Figure S15A and 15 B; Figure 7A-7D). In contrast, FPKMs of TAD boundary  
381 genes are lower than FPKMs of DEGs in 2C and 4C rice (Figure 5G),  
382 indicating that CG hypermethylation of TEs across TAD boundary genes  
383 correlates with the inhibited transcriptions of these genes.

384

385 **Hypermethylated TEs adjacent to TAD boundary genes suppress the**  
386 **transcription of TAD boundary genes upon rice genome doubling**

387 Next, we confirmed the role of TE methylation in the regulation of TAD  
388 boundary genes by comparing the expression levels between TAD boundary  
389 genes and DEGs at different distances to the closest TE in 2C and 4C rice. As  
390 more than 97% TEs are clustered in the 1.2 kb regions away from TAD  
391 boundary genes or DEGs in both 2C and 4C, we analyzed the expressions of  
392 TAD boundary genes or DEGs from 0 to 1.2 kb away from TEs (Supplemental  
393 Data Set S8). In addition, the average TE length is 337bp, therefore, 400bp  
394 was chosen as the distance interval. Compare to TEs in body of boundary  
395 genes (0 bp in Figure 8A for 2C; Figure 8B for 4C), CG, CHG and CHH  
396 methylation levels in TEs at 0-400 bp increase slightly (0-400 bp in Figure 8A  
397 for 2C; Figure 8B for 4C), while the expression level of TAD boundary genes  
398 decreases slightly (0-400 bp in Figure 8C for 2C; Figure 8D for 4C); Compare to  
399 TEs at 0-400 bp, CG, CHG and CHH methylation levels of TEs at 400-800 bp  
400 decrease (400-800 bp in Figure 8A for 2C; Figure 8B for 4C), while the  
401 expression level of TAD boundary genes increases dramatically (400-800 bp  
402 in Figure 8C for 2C; Figure 8D for 4C); Compare to TEs at 400-800 bp, CG,  
403 CHG and CHH methylation levels of TEs at 800-1200 bp increase (400-800 bp  
404 in Figure 8A for 2C; Figure 8B for 4C), while the expression level of TAD  
405 boundary genes decrease (400-800 bp in Figure 8C for 2C; Figure 8D for 4C).  
406 Importantly, the trends of methylations in TEs adjacent to TAD boundary



---

407 genes are opposite to the trends of gene expressions in both 2C and 4C rice  
408 (Figure 8A vs. 8C and Figure 8B vs. 8D). The troughs of DNA methylation  
409 levels appear within 400-800bp away from the closest TE (Figure 8A and 8B).  
410 These data suggested that the expression levels of TAD boundary genes are  
411 positively correlated with the distance to the closest TE in 2C and 4C rice.

412 In contrast, the expression levels of DEGs of 2C rice (2C vs. 4C) decrease  
413 with an increasing distance from TEs. Conversely, the expression levels of  
414 DEGs of 4C rice (4C vs. 2C) increase with an increasing distance from TEs,  
415 and the peak of those expressional levels appear within 800-1200bp away  
416 from the closest TE (Figure 8C and 8D). Importantly, the trends of methylation  
417 in TEs adjacent to DEGs within 1.2 kb are not opposite to that of gene  
418 expression in both 2C and 4C rice (Figure 8A vs. 8C and Figure 8B vs. 8D),  
419 which indicate that the expression levels of DEGs are uncorrelated with the  
420 distance to the closest TE within 1.2 kb in 2C and 4C rice. We proposed that  
421 the hypermethylation in TEs adjacent to TAD boundary genes may buffer the  
422 impact of TAD boundaries on gene transcription.

423

## 424 **Discussion**

425 Polyploidization promotes the evolution of higher plants (Wendel, 2000;  
426 Otto, 2007). Many plants, including *Arabidopsis*, rice, soybean, poplar,  
427 sorghum, and maize, might have experienced whole-genome duplication  
428 events during their evolution (Jiang et al., 2013). More attention has been paid  
429 to the phenotypic, epigenetic and gene expression changes of autopolyploidy  
430 plants, while less attention to the changes of 3D genome and their impacts on  
431 gene expression during autopolyploidization. The study of 3D chromatin  
432 topology of autopolyploid crops is important for understanding the contribution  
433 of spatial organization of genome to the success of polyploidy species. We  
434 previously reported that the altered chromatin interactions in 4C  
435 dicotyledonous *Arabidopsis*, compared to its 2C progenitor, modulate the



436 transcription (Zhang et al., 2019). The study on soybean also proved that  
437 chromatin loop reorganization was involved in gene expression divergence  
438 during soybean domestication (Kato et al., 2020). To better understand the  
439 change of 3D genome during monocotyledonous genome doubling and its  
440 potential effect on gene expression, we performed Hi-C, epigenome and  
441 transcriptome analysis in 4C rice and its progenitor 2C rice. Our results  
442 showed that rice genome doubling obviously dampens intra-chromosomal  
443 interactions. Importantly, the changes of 3D chromatin structure upon rice  
444 genome duplication were found to be uncoupled with gene transcriptions,  
445 which is reminiscent of several reports that 3D chromatin structure are  
446 unrelated to gene expression (Espinola et al., 2021; Ing-Simmons et al., 2021),  
447 (Dong et al., 2020).

448         Although DNA methylation variation has been observed (Lee and Chen,  
449 2001; Madlung et al., 2002; Wang et al., 2004; Lukens et al., 2006;  
450 Kenan-Eichler et al., 2011) during genome duplication in plants, moreover, TE  
451 methylations were also known to be able to affect the expression of nearby  
452 genes in *Arabidopsis* (Wang et al., 2013), rice (Zhang et al., 2015), and maize  
453 (Forestan et al., 2017), however the specific role of TE methylation in 3D  
454 chromatin structure alteration is not clear. It has been known that the 3D  
455 genome architecture modulated gene transcription by bringing together distant  
456 promoter, enhancer, and other cis-regulatory elements (Spitz and Furlong,  
457 2012). Rice genome doubling might be accompanied by the locational  
458 changes of regulatory elements such as promoters and enhancers, which,  
459 however, do not result in the change of gene expression. Interestingly, we  
460 found that the disconnection between transcriptional regulation and A/B  
461 switches or TAD boundaries upon genome duplication is not due to alterations  
462 of DNA methylation in the regulatory sequences of the A/B switch- and TAD  
463 boundary-related genes, but to the changes of DNA methylation in TEs  
464 adjacent to these genes. Our study suggested that autopolyploidization may  
465 stimulate TE modification to reduce the effect of the changes of 3D chromatin

466 structure on gene expressions during genome doubling, the underlying  
467 mechanism might be that the decrease of intra-chromosomal interactions is  
468 beneficial to the activities or methylation of TEs by increasing the genomic  
469 accessibility to DNA methyltransferases and/or demethylases to antagonize  
470 the effect of decreased chromatin interactions on genomic regulation, resulting  
471 in disruption of the correlation between 3D chromatin structure and gene  
472 expression, which might contribute to the success of polyploidy plants during  
473 evolution.

474 In human and animals, many CTCF binding sites are derived from TEs  
475 (Schmidt et al., 2012; Trizzino et al., 2017) and CTCF protein defines the TAD  
476 boundaries to mediate the formation of TADs (Dixon et al., 2012). We found  
477 that TEs adjacent to TAD boundary genes can inhibit the expression of these  
478 genes in both 4C and 2C rice. However, CTCF-like proteins have not been  
479 identified in plants, possibly, there are other elements or proteins in plants that  
480 might play a similar role in defining TAD boundaries to that of CTCF factor in  
481 animals.

482 Increased inter-chromosome interactions and decreased  
483 intra-chromosome arm interactions were observed in 4C *Arabidopsis*  
484 compared to its 2C progenitor (Zhang et al., 2019). 4C *Arabidopsis* seedlings  
485 show obvious phenotypic changes in vegetative stage, including serrated  
486 leaves, more rosette leaves, and increased whole plant size (Zhang et al.,  
487 2019), which is related to the alteration of 3D chromatin structure, resulting in  
488 changes the gene expression at this stage. In contrast, no obvious phenotypes  
489 of monocotyledons 4C rice were observed at vegetative stage, which might be  
490 related to that the 3D chromatin structural changes are not related to gene  
491 expression when 2C rice is duplicated to 4C rice. In ripening stage, the 4C rice  
492 acquires many morphologic traits compared to 2C rice (Zhang et al., 2015)  
493 (Figure 1), it will be therefore of interest to study the relationship between  
494 transcriptional regulation and 3D chromatin organization in the reproductive

495 stage upon rice genome duplication. In addition, there are 698 DEGs in  
496 vegetative stage, since their differential expressions are not caused by DNA  
497 methylation alteration or 3D chromatin rearrangement, there may be other  
498 epigenetic mechanisms which are involved in modulating the expressions of  
499 these 698 genes, such as histone modification, acetylation or noncoding  
500 RNAs.

501 The relationships between higher-order chromatin structure with other  
502 epigenetic regulation, including DNA methylation, histone modifications and  
503 noncoding RNAs are implicated at multiple developmental processes. In  
504 human cells, it was found that large DNA methylation nadirs can mediate the  
505 formation of long loops (Zhang et al., 2020). In *Arabidopsis*, it was reported  
506 that lncRNA (APOLO) can modulate local chromatin 3D conformation through  
507 regulating the conformation of DNA-RNA loops within the nuclei (Ariel et al.,  
508 2020). Histone modifications mediate the impact of genetic risk variants  
509 related to schizophrenia by modulating chromatin higher-order structure (Punzi  
510 et al., 2018). Here we found that TE methylation diminishes the impact of the  
511 alteration of chromatin higher-order structure on gene expression. It will be  
512 worthy to study the specific epigenetic networks that include high-order  
513 chromatin architecture, DNA and histone modifications, noncoding RNAs and  
514 other epigenetic factors during plant genome duplication.

515

## 516 **Materials and Methods**

### 517 **Plant materials**

518 Autotetraploid (4C) rice line was artificially synthesized from *O. sativa* ssp.  
519 *indica* cultivar 9311 (2C).

520

### 521 **Characterization of agronomic traits**

522 All plants were cultured in nutrient solution (Han LZ, 2006) in a growth  
523 chamber with 28°C /25°C (day/night) and 12 h/12 h (light/dark) cycles. After

524 germination for 15 days, the rice seedlings were transferred to the field. The  
525 agronomic traits including plant height, flag leaf length, flag leaf width, tillering  
526 number, panicle length, grains per panicle, grain weight, grain length, grain  
527 width were scored in parallel between 2C and 4C rice. The traits were selected  
528 and analyzed according to the Descriptors and Data Standard for Rice (*O.*  
529 *sativa* L.) (Han LZ, 2006).

530

### 531 **Flow cytometry**

532 Ten-day-old 2C and 4C rice seedlings were collected into pre-cooled plate,  
533 and then chopped with a new razor blade to release nuclei in the sterile lysis  
534 buffer (45 mM MgCl<sub>2</sub>·6H<sub>2</sub>O, 30 mM trisodium citrate, 20 mM MOPS, 1% Triton  
535 X-100, pH 7.0) for 3-5 min until the buffer turns green. Transfer the mixture into  
536 strainer. The filtrates were added with the final concentration of 1 ng / ml DAPI  
537 solution, and then cultured in dark on ice for 30 min. The ploidy levels were  
538 measured by flow cytometry (Beckman Coulter MoFlo XDP, USA).

539

### 540 **Hi-C library preparation**

541 Hi-C experiments were performed essentially as described (Grob et al., 2014)  
542 with some modifications. Two biological replicates of 2C and 4C rice were  
543 performed. In short, 2.5g of the above ground parts of 10-day-old seedlings  
544 were fixed (2% formaldehyde, 10% PBS) and ground into powder in liquid  
545 nitrogen. The extracted nuclei were digested by incubation with 600 U *Hind*III  
546 restriction enzyme at 37°C overnight, and the digested chromatin at 1µl 10 mM  
547 dATP, dTTP, dGTP and 25µl 0.4mM biotin-14-dCTP and 100 U Klenow  
548 fragment was placed at 37°C for 45 min. The ligation reaction was then carried  
549 out in 10× volume of ligation buffer and shaken with 745 µl 10× ligation buffer,  
550 10% Triton X-100, 80µl 10 mg/ml BSA and ATP, 100 Weiss U T4 DNA ligase at  
551 16°C for 6 hours. Then reversely cross-linked with proteinase K at 65°C  
552 overnight. Subsequently, the extracted chromatin was fragmented into an  
553 average size of 300 bp by ultrasound (Covaris s220). The Hi-C library was

554 constructed with NEB Next Multiplex Oligos kit and KAPA Hyper Prep Kit. The  
555 final library was sequenced on Illumina HiSeq X Ten instrument with 2 × 150  
556 bp reads.

557

### 558 **Hi-C sequencing data processing**

559 Hic-pro (Servant et al., 2015) and Bowtie2 (Langmead and Salzberg, 2012)  
560 were used for Hi-C read mapping. The clean Hi-C reads of 2C and 4C rice  
561 were aligned to the genome of *O. sativa* Indica (Yu et al., 2002) after removing  
562 the adapter. Following processing with HiC-Pro and Juicer software (Durand et  
563 al., 2016), valid pairs of 2C and 4C rice were used to create interaction  
564 matrixes with bin size 50 kb for further analysis. The reproducibility of two  
565 biological replicates was tested with Pearson correlation coefficient from the  
566 ICE normalized interaction matrixes (Lin et al., 2018). Hicpro2juicebox was  
567 used to generate input file for Juicebox. The interaction matrixes were  
568 normalized with KR method from Juicer at resolutions 5 kb, 10 kb and 50 kb  
569 (Durand et al., 2016). After excluding the pericentromeres as reported (Grob et  
570 al., 2014), the first principal component was used to identify compartments  
571 with Juicer at 50 kb resolution, and the direction of compartment with high  
572 gene expression was defined as A compartment, and the opposite direction as  
573 B compartment. We calculated loops and differential loops at 5 kb and 10 kb  
574 resolutions, using HICCUPS and HICCUPS Diff in Juicer (Durand et al., 2016).  
575 We used TADCompare (Cresswell and Dozmorov, 2020) to calculate the TAD  
576 structure at a 10 kb resolution.

577

### 578 **Calculation of chromatin interactions and interaction decay exponents**

579 The normalized interaction matrix of 2C rice was divided by the normalized  
580 interaction matrix of 4C rice, and all zeros in the matrix were replaced with the  
581 smallest non-zero elements in each matrix to analyze the difference between  
582 2C and 4C rice interaction matrices. We used log<sub>2</sub> transform and median  
583 normalization to standardize the difference matrix. Interaction decay

584 exponents (IDEs) of chromosomes, pericentromeres and telomeres were  
585 calculated (Grob et al., 2014) to study the variation of interaction frequency  
586 dependent on the genome distance, the CPM normalization method was used  
587 to process the data.

588

### 589 **Bootstrapping analysis**

590 In the bootstrapping strategies (Buonaccorsi et al., 2018), we randomly  
591 selected 10000 groups ( $n = 10000$  times) of the same number of DEGs, and  
592 performed the same analysis to determine the percentage of those genes  
593 overlapped with A/B switch region genes or TAD changed genes. When the  
594 percentile of the test sample was higher than the top five percentiles of the  
595 control distribution, it is considered as statistically significant.

596

### 597 **RNA-seq analysis**

598 Total RNAs were extracted from 10-day-old 2C and 4C rice seedlings using the  
599 RNeasy plant mini kit (Qiagen). cDNA library construction and sequencing  
600 were carried out by Beijing Genomics Institute (BGI) using BGISEQ-500  
601 platform for 50 bp single-end sequencing as previously described (Huang et al.,  
602 2018) . At least 20 M clean reads of sequencing depth were obtained for each  
603 sample. Three independent biological replicates were performed. The clean  
604 reads were separately aligned to the genome of *O. sativa* Indica (Yu et al.,  
605 2002) with orientation mode using Tophat software  
606 (<http://tophat.cbcb.umd.edu/>). The fragments per kilobase of exon per million  
607 mapped reads (FPKMs) method was used to calculate the expression level of  
608 each transcript. The differential expression analysis was carried out using the  
609 classical normalization method of DESeq2 R package (Love et al., 2014) with  
610 a 0.05  $p$ -value, 0.05 false discovery rate, and cutoff of 1 log-fold change. The  
611 hypergeometric test was performed as previously described (Wollmann et al.,  
612 2017). Blast2GO method was used to find homologous genes in japonica rice  
613 genome (MSU), and GO functional enrichment analysis was performed by

614 DAVID (<https://david.ncifcrf.gov/>).

615

### 616 **DNA methylation analysis**

617 For whole genome bisulfite sequencing (WGBS), genomic DNA (gDNA) was  
618 extracted from 10-day-old 2C and 4C rice seedlings with the DNeasy plant  
619 mini kit (Qiagen) per manufacturer's introduction. Library construction and  
620 sequencing were performed by Beijing Genomics Institute (BGI) using Illumina  
621 HiSeq-2000 for 100 bp paired-end sequencing. To facilitate the analysis of  
622 DNA methylation data, we used Batmeth2  
623 (<https://github.com/GuoliangLi-HZAU/BatMeth2>), an integrated multi-functional  
624 software for DNA methylation analysis (Zhou et al., 2019a), including  
625 sequencing sequence quality filtering, DNA methylation sequence alignment,  
626 DNA methylation level calculation and functional annotation.

627

### 628 **Calculation of the distance between a DEG and differentially methylated 629 regions (DMRs)**

630 The whole genome was divided into 1000-bp bins to identify the DMRs in  
631 which the absolute value of difference in DNA methylation between 2C and 4C  
632 was 0.6 or above, and the adjusted  $q$  value of Fisher's exact test was 0.05 or  
633 less by using BatMeth2 (Zhou et al., 2019b). Finally, the shortest genomic  
634 distance of a given DEG and all DMRs in turn was calculated.

635

### 636 **TE annotation and analysis**

637 By running RepeatMasker (v4.0.3, [www.repeatmasker.org](http://www.repeatmasker.org)), the repetitive  
638 library of RepBase (v20130422) was used to compare the rice reference  
639 genome sequences. To compare the methylation status of TEs between the  
640 2C and 4C rice genomes, we excluded TEs with less than 40% of cytosines  
641 and coverage of BS reads less than 3. The remaining TEs were used for  
642 further analysis. Using this cut-off value, we obtained a data set of 478599 TEs  
643 for the subsequent analysis.



644

### 645 **Small RNA-seq and data processing**

646 Small RNAs (sRNAs) were isolated from 10-day-old rice seedlings using  
647 mirVana™ miRNA Isolation Kit (Ambion, AM1561) and sequenced by Illumina  
648 high-throughput sequencing. The small RNA data were processed and  
649 analyzed according to the previous description (McCormick et al., 2011) with  
650 minor modifications. In brief, the raw sequencing reads were trimmed using  
651 cutadapt (v1.2.1) to remove adapters, and sRNAs between 16 and 35 nt in  
652 lengths were selected and mapped to the rice genome (Yu et al., 2002; Zhao  
653 et al., 2004).

654 sRNAs that matched against the databases including the Rfam database  
655 (Burge et al., 2013) and miRBase (Kozomara and Griffiths-Jones, 2011) were  
656 discarded. 24-nt reads that did not match miRNAs, snRNAs, rRNAs, tRNAs, or  
657 snoRNAs were filtered and mapped to the genome 1–1,000 times as siRNAs  
658 for analyses. The siRNA count was based on the total abundance of genome  
659 matched small RNA reads, normalized to reads per million, excluding sRNAs  
660 of the above structures, and dividing the number of reads evenly by the  
661 number of genome hits. A siRNA cluster was defined as containing at least five  
662 different siRNA reading sequences, and adjacent reading sequences less than  
663 200 bp apart were combined into a cluster.

664

### 665 **Accession numbers**

666 The Hi-C, WGBS and RNA-seq datasets have been submitted to NCBI  
667 (PRJNA725914).

668

### 669 **Supplemental data**

670 The following materials are available in the online version of this article.

671 **Supplemental Figure S1.** Flow-Cytometric DNA histograms for diploid and  
672 autotetraploid rice.

673 **Supplemental Figure S2.** Gene Ontology (GO) analysis of the up- and

674 down-regulated genes in autotetraploid compared to diploid rice.

675 **Supplemental Figure S3.** Reproducibility analysis of Hi-C biological  
676 replicates.

677 **Supplemental Figure S4.** Interaction decay exponents of intra-chromosome  
678 arm interactions in each chromosome

679 **Supplemental Figure S5.** The TADs and loops are unrelated to transcription.

680 **Supplemental Figure S6.** The comparison of DNA methylation levels between  
681 2C and 4C rice.

682 **Supplemental Figure S7.** DNA methylation levels in DEG promoters in 2C are  
683 similar to those in 4C rice, and CG and CHG methylation levels in non-DEG  
684 promoters in 2C rice are lower than those in 4C rice.

685 **Supplemental Figure S8.** The genomic distances between DEGs and  
686 differential methylation regions (DMRs).

687 **Supplemental Figure S9.** Average methylation level distribution over class I  
688 TEs.

689 **Supplemental Figure S10.** Average methylation level distribution over class II  
690 TEs.

691 **Supplemental Figure S11.** The methylation levels of TEs in promoters of  
692 DEGs and non-DEGs show no significant differences between 2C and 4C rice.

693 **Supplemental Figure S12.** Boxplots showing FPKMs between DEGs and  
694 non-DEGs in compartment A/B switched regions in 2C and 4C rice.

695 **Supplemental Figure S13.** The comparison of siRNAs between 2C and 4C  
696 rice.

697 **Supplemental Figure S14.** SiRNA abundance over TEs in TAD boundary  
698 genes and DEGs between 2C and 4C rice.

699 **Supplemental Figure S15.** The CG, CHG and CHH methylations in TEs of 2C  
700 and 4C rice.

701 **Supplemental Data Set S1.** List of DEGs in 4C rice compared to 2C rice.

702 **Supplemental Data Set S2.** GO-term categories of regulated genes in 4C rice  
703 compared to 2C rice.

704 **Supplemental Data Set S3.** The quality of Hi-C reads in 2C and 4C rice.  
705 **Supplemental Data Set S4.** List of DEGs in chromatin compartment A/B  
706 switched regions.  
707 **Supplemental Data Set S5.** List of non-DEGs in chromatin compartment A/B  
708 switched regions.  
709 **Supplemental Data Set S6.** Bisulfite sequencing statistics.  
710 **Supplemental Data Set S7.** List of TAD boundary genes in 2C and 4C rice.  
711 **Supplemental Data Set S8.** The numbers of TAD boundary genes and DEGs  
712 within different distances to TEs or the numbers of TEs within different  
713 distances to TAD boundary genes and DEGs

714

#### 715 **Acknowledgments**

716 This work was supported by the National Key Research and Development  
717 Program of China (2016YFD0100902) and National Science Foundation of  
718 China (31871230 and 32170585 to Y.F. and 31971334 to Z.S.).

719

#### 720 **Authors' contributions**

721 Z.S. and Y.F. designed the study; Z.S., Y.W., Z.S., H.Z., M.M., Z.T., P.W., Y.F.,  
722 and D.C. performed the research; Z.S., Y.W., G.L., and Y.F. analyzed the data;  
723 Z.S. and Y.F. wrote the paper. All authors discussed the results and made  
724 comments on the manuscript.

725

726 *Conflict of interest statement.* The authors declare that they have no  
727 competing interests.

728

#### 729 **REFERENCES**

730 Akdemir, K.C., Le VT, Chandran, S., Li, Y., Verhaak, R.G., Beroukhim, R., Campbell, P.J.,  
731 Chin, L., Dixon, J.R., and Futreal, P.A. (2020). Disruption of chromatin folding domains by somatic  
732 genomic rearrangements in human cancer. *NAT GENET* **52**, 294-305.  
733 Ariel, F., Lucero, L., Christ, A., Mammarella, M.F., Jegu, T., Veluchamy, A., Mariappan, K.,  
734 Latrasse, D., Blein, T., Liu, C., Benhamed, M., and Crespi, M. (2020). R-Loop Mediated trans

- 735 Action of the APOLO Long Noncoding RNA. *MOL CELL* **77**, 1055-1065.
- 736 **Becak, M.L.** (2014). Polyploidy and epigenetic events in the evolution of Anura. *Genet Mol Res* **13**,  
737 5995-6014.
- 738 **Becker, C., Hagmann, J., Muller, J., Koenig, D., Stegle, O., Borgwardt, K., and Weigel, D.** (2011).  
739 Spontaneous epigenetic variation in the Arabidopsis thaliana methylome. *NATURE* **480**, 245-249.
- 740 **Bonev, B., Mendelson, C.N., Szabo, Q., Fritsch, L., Papadopoulos, G.L., Lubling, Y., Xu, X., Lv,  
741 X., Hugnot, J.P., Tanay, A., and Cavalli, G.** (2017). Multiscale 3D Genome Rewiring during Mouse  
742 Neural Development. *CELL* **171**, 557-572.
- 743 **Buonaccorsi, J.P., Romeo, G., and Thoresen, M.** (2018). Model-based bootstrapping when  
744 correcting for measurement error with application to logistic regression. *BIOMETRICS* **74**, 135-144.
- 745 **Burge, S.W., Daub, J., Eberhardt, R., Tate, J., Barquist, L., Nawrocki, E.P., Eddy, S.R., Gardner,  
746 P.P., and Bateman, A.** (2013). Rfam 11.0: 10 years of RNA families. *NUCLEIC ACIDS RES* **41**,  
747 D226-D232.
- 748 **Chao, D.Y., Dilkes, B., Luo, H., Douglas, A., Yakubova, E., Lahner, B., and Salt, D.E.** (2013).  
749 Polyploids exhibit higher potassium uptake and salinity tolerance in Arabidopsis. *SCIENCE* **341**,  
750 658-659.
- 751 **Chen, Z.J., and Ni, Z.** (2006). Mechanisms of genomic rearrangements and gene expression changes  
752 in plant polyploids. *BIOESSAYS* **28**, 240-252.
- 753 **Concia, L., Veluchamy, A., Ramirez-Prado, J.S., Martin-Ramirez, A., Huang, Y., Perez, M.,  
754 Domenichini, S., Rodriguez, G.N., Kim, S., Blein, T., Duncan, S., Pichot, C., Manza-Mianza, D.,  
755 Juery, C., Paux, E., Moore, G., Hirt, H., Bergounioux, C., Crespi, M., Mahfouz, M.M.,  
756 Bendahmane, A., Liu, C., Hall, A., Raynaud, C., Latrasse, D., and Benhamed, M.** (2020). Wheat  
757 chromatin architecture is organized in genome territories and transcription factories. *GENOME BIOL*  
758 **21**, 104.
- 759 **Cremer, T., and Cremer, M.** (2010). Chromosome territories. *Cold Spring Harb Perspect Biol* **2**,  
760 a3889.
- 761 **Cremer, T., Cremer, M., Dietzel, S., Muller, S., Solovei, I., and Fakan, S.** (2006). Chromosome  
762 territories--a functional nuclear landscape. *CURR OPIN CELL BIOL* **18**, 307-316.
- 763 **Cresswell, K.G., and Dozmorov, M.G.** (2020). TADCompare: An R Package for Differential and  
764 Temporal Analysis of Topologically Associated Domains. *FRONT GENET* **11**, 158.
- 765 **de Laat, W., and Duboule, D.** (2013). Topology of mammalian developmental enhancers and their  
766 regulatory landscapes. *NATURE* **502**, 499-506.
- 767 **Diez, C.M., Roessler, K., and Gaut, B.S.** (2014). Epigenetics and plant genome evolution. *CURR*  
768 *OPIN PLANT BIOL* **18**, 1-8.
- 769 **Dixon, J.R., Selvaraj, S., Yue, F., Kim, A., Li, Y., Shen, Y., Hu, M., Liu, J.S., and Ren, B.** (2012).  
770 Topological domains in mammalian genomes identified by analysis of chromatin interactions.  
771 *NATURE* **485**, 376-380.
- 772 **Dong, P., Tu, X., Li, H., Zhang, J., Grierson, D., Li, P., and Zhong, S.** (2020). Tissue-specific Hi-C  
773 analyses of rice, foxtail millet and maize suggest non-canonical function of plant chromatin domains. *J*  
774 *INTEGR PLANT BIOL* **62**, 201-217.
- 775 **Durand, N.C., Shamim, M.S., Machol, I., Rao, S.S., Huntley, M.H., Lander, E.S., and Aiden, E.L.**  
776 (2016). Juicer Provides a One-Click System for Analyzing Loop-Resolution Hi-C Experiments. *CELL*  
777 *SYST* **3**, 95-98.
- 778 **Espinola, S.M., Gotz, M., Bellec, M., Messina, O., Fiche, J.B., Houbron, C., Dejean, M., Reim, I.,**

- 779 **Cardozo, G.A., Lagha, M., and Nollmann, M.** (2021). Cis-regulatory chromatin loops arise before  
780 TADs and gene activation, and are independent of cell fate during early *Drosophila* development. *NAT*  
781 *GENET* **53**, 477-486.
- 782 **Feng, S., and Jacobsen, S.E.** (2011). Epigenetic modifications in plants: an evolutionary perspective.  
783 *CURR OPIN PLANT BIOL* **14**, 179-186.
- 784 **Feng, S., Cokus, S.J., Zhang, X., Chen, P.Y., Bostick, M., Goll, M.G., Hetzel, J., Jain, J., Strauss,**  
785 **S.H., Halpern, M.E., Ukomadu, C., Sadler, K.C., Pradhan, S., Pellegrini, M., and Jacobsen, S.E.**  
786 (2010). Conservation and divergence of methylation patterning in plants and animals. *Proc Natl Acad*  
787 *Sci U S A* **107**, 8689-8694.
- 788 **Filippova, D., Patro, R., Duggal, G., and Kingsford, C.** (2014). Identification of alternative  
789 topological domains in chromatin. *Algorithms Mol Biol* **9**, 14.
- 790 **Forestan, C., Farinati, S., Aiese, C.R., Lunardon, A., Sanseverino, W., and Varotto, S.** (2017).  
791 Maize RNA PolIV affects the expression of genes with nearby TE insertions and has a genome-wide  
792 repressive impact on transcription. *BMC PLANT BIOL* **17**, 161.
- 793 **Fraser, P.** (2006). Transcriptional control through a loop. *CURR OPIN GENET DEV* **16**, 490-495.
- 794 **Ghavi-Helm, Y., Jankowski, A., Meiers, S., Viales, R.R., Korb, J.O., and Furlong, E.** (2019).  
795 Highly rearranged chromosomes reveal uncoupling between genome topology and gene expression.  
796 *NAT GENET* **51**, 1272-1282.
- 797 **Gibcus, J.H., and Dekker, J.** (2013). The hierarchy of the 3D genome. *MOL CELL* **49**, 773-782.
- 798 **Grob, S., Schmid, M.W., and Grossniklaus, U.** (2014). Hi-C analysis in *Arabidopsis* identifies the  
799 KNOT, a structure with similarities to the flamenco locus of *Drosophila*. *MOL CELL* **55**, 678-693.
- 800 **Han LZ, W.X.** (2006). *Descriptors and Data Standard for Rice (Oryza sativa L.)*. (China Agricultural  
801 Press, Beijing).
- 802 **Huang, Y., Xu, Z., Xiong, S., Qin, G., Sun, F., Yang, J., Yuan, T.F., Zhao, L., Wang, K., Liang,**  
803 **Y.X., Fu, L., Wu, T., So, K.F., Rao, Y., and Peng, B.** (2018). Dual extra-retinal origins of microglia  
804 in the model of retinal microglia repopulation. *CELL DISCOV* **4**, 9.
- 805 **Ibn-Salem, J., Kohler, S., Love, M.I., Chung, H.R., Huang, N., Hurles, M.E., Haendel, M.,**  
806 **Washington, N.L., Smedley, D., Mungall, C.J., Lewis, S.E., Ott, C.E., Bauer, S., Schofield, P.N.,**  
807 **Mundlos, S., Spielmann, M., and Robinson, P.N.** (2014). Deletions of chromosomal regulatory  
808 boundaries are associated with congenital disease. *GENOME BIOL* **15**, 423.
- 809 **Ing-Simmons, E., Vaid, R., Bing, X.Y., Levine, M., Mannervik, M., and Vaquerizas, J.M.** (2021).  
810 Independence of chromatin conformation and gene regulation during *Drosophila* dorsoventral  
811 patterning. *NAT GENET* **53**, 487-499.
- 812 **Jiang, W.K., Liu, Y.L., Xia, E.H., and Gao, L.Z.** (2013). Prevalent role of gene features in  
813 determining evolutionary fates of whole-genome duplication duplicated genes in flowering plants.  
814 *PLANT PHYSIOL* **161**, 1844-1861.
- 815 **Jones, P.A.** (2012). Functions of DNA methylation: islands, start sites, gene bodies and beyond. *NAT*  
816 *REV GENET* **13**, 484-492.
- 817 **Kato, S., Yokota, Y., Suzuki, R., Fujisawa, Y., Sayama, T., Kaga, A., Anai, T., Komatsu, K., Oki,**  
818 **N., Kikuchi, A., and Ishimoto, M.** (2020). Identification of a cytochrome P450 hydroxylase,  
819 CYP81E22, as a causative gene for the high sensitivity of soybean to herbicide bentazon. *THEOR*  
820 *APPL GENET* **133**, 2105-2115.
- 821 **Kawashima, T., and Berger, F.** (2014). Epigenetic reprogramming in plant sexual reproduction. *NAT*  
822 *REV GENET* **15**, 613-624.

- 823 **Kenan-Eichler, M., Leshkowitz, D., Tal, L., Noor, E., Melamed-Bessudo, C., Feldman, M., and**  
824 **Levy, A.A.** (2011). Wheat hybridization and polyploidization results in deregulation of small RNAs.  
825 *GENETICS* **188**, 263-272.
- 826 **Kozomara, A., and Griffiths-Jones, S.** (2011). miRBase: integrating microRNA annotation and  
827 deep-sequencing data. *NUCLEIC ACIDS RES* **39**, D152-D157.
- 828 **Langmead, B., and Salzberg, S.L.** (2012). Fast gapped-read alignment with Bowtie 2. *NAT*  
829 *METHODS* **9**, 357-359.
- 830 **Law, J.A., and Jacobsen, S.E.** (2010). Establishing, maintaining and modifying DNA methylation  
831 patterns in plants and animals. *NAT REV GENET* **11**, 204-220.
- 832 **Lee, H.S., and Chen, Z.J.** (2001). Protein-coding genes are epigenetically regulated in Arabidopsis  
833 polyploids. *Proc Natl Acad Sci U S A* **98**, 6753-6758.
- 834 **Liang, Z., Zhang, Q., Ji, C., Hu, G., Zhang, P., Wang, Y., Yang, L., and Gu, X.** (2021).  
835 Reorganization of the 3D chromatin architecture of rice genomes during heat stress. *BMC BIOL* **19**,  
836 53.
- 837 **Lieberman-Aiden, E., van Berkum, N.L., Williams, L., Imakaev, M., Ragoczy, T., Telling, A.,**  
838 **Amit, I., Lajoie, B.R., Sabo, P.J., Dorschner, M.O., Sandstrom, R., Bernstein, B., Bender, M.A.,**  
839 **Groudine, M., Gnirke, A., Stamatoyannopoulos, J., Mirny, L.A., Lander, E.S., and Dekker, J.**  
840 (2009). Comprehensive mapping of long-range interactions reveals folding principles of the human  
841 genome. *SCIENCE* **326**, 289-293.
- 842 **Lin, D., Hong, P., Zhang, S., Xu, W., Jamal, M., Yan, K., Lei, Y., Li, L., Ruan, Y., Fu, Z.F., Li, G.,**  
843 **and Cao, G.** (2018). Digestion-ligation-only Hi-C is an efficient and cost-effective method for  
844 chromosome conformation capture. *NAT GENET* **50**, 754-763.
- 845 **Love, M.I., Huber, W., and Anders, S.** (2014). Moderated estimation of fold change and dispersion  
846 for RNA-seq data with DESeq2. *GENOME BIOL* **15**, 550.
- 847 **Lukens, L.N., Pires, J.C., Leon, E., Vogelzang, R., Oslach, L., and Osborn, T.** (2006). Patterns of  
848 sequence loss and cytosine methylation within a population of newly resynthesized Brassica napus  
849 allopolyploids. *PLANT PHYSIOL* **140**, 336-348.
- 850 **Luo, C., Sidote, D.J., Zhang, Y., Kerstetter, R.A., Michael, T.P., and Lam, E.** (2013). Integrative  
851 analysis of chromatin states in Arabidopsis identified potential regulatory mechanisms for natural  
852 antisense transcript production. *PLANT J* **73**, 77-90.
- 853 **Lupianez, D.G., Kraft, K., Heinrich, V., Krawitz, P., Brancati, F., Klopocki, E., Horn, D.,**  
854 **Kayserili, H., Opitz, J.M., Laxova, R., Santos-Simarro, F., Gilbert-Dussardier, B., Wittler, L.,**  
855 **Borschiwer, M., Haas, S.A., Osterwalder, M., Franke, M., Timmermann, B., Hecht, J.,**  
856 **Spielmann, M., Visel, A., and Mundlos, S.** (2015). Disruptions of topological chromatin domains  
857 cause pathogenic rewiring of gene-enhancer interactions. *CELL* **161**, 1012-1025.
- 858 **Madlung, A., Masuelli, R.W., Watson, B., Reynolds, S.H., Davison, J., and Comai, L.** (2002).  
859 Remodeling of DNA methylation and phenotypic and transcriptional changes in synthetic Arabidopsis  
860 allotetraploids. *PLANT PHYSIOL* **129**, 733-746.
- 861 **Marcussen, T., Sandve, S.R., Heier, L., Spannagl, M., Pfeifer, M., Jakobsen, K.S., Wulff, B.B.,**  
862 **Steuernagel, B., Mayer, K.F., and Olsen, O.A.** (2014). Ancient hybridizations among the ancestral  
863 genomes of bread wheat. *SCIENCE* **345**, 1250092.
- 864 **Matzke, M.A., and Mosher, R.A.** (2014). RNA-directed DNA methylation: an epigenetic pathway of  
865 increasing complexity. *NAT REV GENET* **15**, 394-408.
- 866 **McCormick, K.P., Willmann, M.R., and Meyers, B.C.** (2011). Experimental design, preprocessing,



867 normalization and differential expression analysis of small RNA sequencing experiments. *Silence* **2**, 2.  
868 **Meaburn, K.J., and Misteli, T.** (2007). Cell biology: chromosome territories. *NATURE* **445**,  
869 379-781.  
870 **Moore, L.D., Le T, and Fan, G.** (2013). DNA methylation and its basic function.  
871 *NEUROPSYCHOPHARMACOL* **38**, 23-38.  
872 **Mu, H.Z., Liu, Z.J., Lin, L., Li, H.Y., Jiang, J., and Liu, G.F.** (2012). Transcriptomic analysis of  
873 phenotypic changes in birch (*Betula platyphylla*) autotetraploids. *INT J MOL SCI* **13**, 13012-13029.  
874 **Mukherjee, A., and Mukherjea, R.N.** (1988). Kinetic regulation of hexokinase activity in a  
875 heterogeneous branched bienzyme system. *Biochim Biophys Acta* **954**, 126-136.  
876 **Otto, S.P.** (2007). The evolutionary consequences of polyploidy. *CELL* **131**, 452-462.  
877 **Ouyang, W., Xiong, D., Li, G., and Li, X.** (2020). Unraveling the 3D Genome Architecture in Plants:  
878 Present and Future. *MOL PLANT* **13**, 1676-1693.  
879 **Paun, O., Bateman, R.M., Fay, M.F., Luna, J.A., Moat, J., Hedren, M., and Chase, M.W.** (2011).  
880 Altered gene expression and ecological divergence in sibling allopolyploids of *Dactylorhiza*  
881 (*Orchidaceae*). *BMC EVOL BIOL* **11**, 113.  
882 **Peng, T., Lv, Q., Zhang, J., Li, J., Du Y, and Zhao, Q.** (2011). Differential expression of the  
883 microRNAs in superior and inferior spikelets in rice (*Oryza sativa*). *J EXP BOT* **62**, 4943-4954.  
884 **Phillips, J.E., and Corces, V.G.** (2009). CTCF: master weaver of the genome. *CELL* **137**, 1194-1211.  
885 **Punzi, G., Bharadwaj, R., and Ursini, G.** (2018). Neuroepigenetics of Schizophrenia. *Prog Mol Biol*  
886 *Transl Sci* **158**, 195-226.  
887 **Roulin, A., Auer, P.L., Libault, M., Schlueter, J., Farmer, A., May, G., Stacey, G., Doerge, R.W.,**  
888 **and Jackson, S.A.** (2013). The fate of duplicated genes in a polyploid plant genome. *PLANT J* **73**,  
889 143-153.  
890 **Schmidt, D., Schwalie, P.C., Wilson, M.D., Ballester, B., Goncalves, A., Kutter, C., Brown, G.D.,**  
891 **Marshall, A., Flicek, P., and Odom, D.T.** (2012). Waves of retrotransposon expansion remodel  
892 genome organization and CTCF binding in multiple mammalian lineages. *CELL* **148**, 335-348.  
893 **Schmitz, R.J., Schultz, M.D., Lewsey, M.G., O'Malley, R.C., Urich, M.A., Libiger, O., Schork,**  
894 **N.J., and Ecker, J.R.** (2011). Transgenerational epigenetic instability is a source of novel methylation  
895 variants. *SCIENCE* **334**, 369-373.  
896 **Schubeler, D.** (2015). Function and information content of DNA methylation. *NATURE* **517**, 321-326.  
897 **Seoighe, C., and Gehring, C.** (2004). Genome duplication led to highly selective expansion of the  
898 *Arabidopsis thaliana* proteome. *TRENDS GENET* **20**, 461-464.  
899 **Servant, N., Varoquaux, N., Lajoie, B.R., Viara, E., Chen, C.J., Vert, J.P., Heard, E., Dekker, J.,**  
900 **and Barillot, E.** (2015). HiC-Pro: an optimized and flexible pipeline for Hi-C data processing.  
901 *GENOME BIOL* **16**, 259.  
902 **Smith, Z.D., and Meissner, A.** (2013). DNA methylation: roles in mammalian development. *NAT*  
903 *REV GENET* **14**, 204-220.  
904 **Soltis, P.S., Marchant, D.B., Van de Peer, Y., and Soltis, D.E.** (2015). Polyploidy and genome  
905 evolution in plants. *CURR OPIN GENET DEV* **35**, 119-125.  
906 **Spitz, F., and Furlong, E.E.** (2012). Transcription factors: from enhancer binding to developmental  
907 control. *NAT REV GENET* **13**, 613-626.  
908 **Trizzino, M., Park, Y., Holsbach-Beltrame, M., Aracena, K., Mika, K., Caliskan, M., Perry, G.H.,**  
909 **Lynch, V.J., and Brown, C.D.** (2017). Transposable elements are the primary source of novelty in  
910 primate gene regulation. *GENOME RES* **27**, 1623-1633.



- 911 **Wang, C., Liu, C., Roqueiro, D., Grimm, D., Schwab, R., Becker, C., Lanz, C., and Weigel, D.**  
912 (2015). Genome-wide analysis of local chromatin packing in *Arabidopsis thaliana*. *GENOME RES* **25**,  
913 246-256.
- 914 **Wang, J., Tian, L., Madlung, A., Lee, H.S., Chen, M., Lee, J.J., Watson, B., Kagochi, T., Comai,**  
915 **L., and Chen, Z.J.** (2004). Stochastic and epigenetic changes of gene expression in *Arabidopsis*  
916 polyploids. *GENETICS* **167**, 1961-1973.
- 917 **Wang, M., Wang, P., Lin, M., Ye, Z., Li, G., Tu, L., Shen, C., Li, J., Yang, Q., and Zhang, X.**  
918 (2018). Evolutionary dynamics of 3D genome architecture following polyploidization in cotton. *NAT*  
919 *PLANTS* **4**, 90-97.
- 920 **Wang, X., Weigel, D., and Smith, L.M.** (2013). Transposon variants and their effects on gene  
921 expression in *Arabidopsis*. *PLOS GENET* **9**, e1003255.
- 922 **Wendel, J.F.** (2000). Genome evolution in polyploids. *PLANT MOL BIOL* **42**, 225-249.
- 923 **Wollmann, H., Stroud, H., Yelagandula, R., Tarutani, Y., Jiang, D., Jing, L., Jamge, B., Takeuchi,**  
924 **H., Holec, S., Nie, X., Kakutani, T., Jacobsen, S.E., and Berger, F.** (2017). The histone H3 variant  
925 H3.3 regulates gene body DNA methylation in *Arabidopsis thaliana*. *GENOME BIOL* **18**, 94.
- 926 **Wu, J., Shahid, M.Q., Guo, H., Yin, W., Chen, Z., Wang, L., Liu, X., and Lu, Y.** (2014a).  
927 Comparative cytological and transcriptomic analysis of pollen development in autotetraploid and  
928 diploid rice. *PLANT REPROD* **27**, 181-196.
- 929 **Wu, J., Shahid, M.Q., Guo, H., Yin, W., Chen, Z., Wang, L., Liu, X., and Lu, Y.** (2014b).  
930 Comparative cytological and transcriptomic analysis of pollen development in autotetraploid and  
931 diploid rice. *PLANT REPROD* **27**, 181-196.
- 932 **Yang, M., Vesterlund, M., Siavelis, I., Moura-Castro, L.H., Castor, A., Fioretos, T., Jafari, R.,**  
933 **Lilljebjorn, H., Odom, D.T., Olsson, L., Ravi, N., Woodward, E.L., Harewood, L., Lehtio, J., and**  
934 **Paulsson, K.** (2019). Proteogenomics and Hi-C reveal transcriptional dysregulation in high  
935 hyperdiploid childhood acute lymphoblastic leukemia. *NAT COMMUN* **10**, 1519.
- 936 **Yu, J., Hu, S., Wang, J., Wong, G.K., Li, S., Liu, B., Deng, Y., Dai, L., Zhou, Y., Zhang, X., Cao,**  
937 **M., Liu, J., Sun, J., Tang, J., Chen, Y., Huang, X., Lin, W., Ye, C., Tong, W., Cong, L., Geng, J.,**  
938 **Han, Y., Li, L., Li, W., Hu, G., Huang, X., Li, W., Li, J., Liu, Z., Li, L., Liu, J., Qi, Q., Liu, J., Li,**  
939 **L., Li, T., Wang, X., Lu, H., Wu, T., Zhu, M., Ni, P., Han, H., Dong, W., Ren, X., Feng, X., Cui, P.,**  
940 **Li, X., Wang, H., Xu, X., Zhai, W., Xu, Z., Zhang, J., He, S., Zhang, J., Xu, J., Zhang, K., Zheng,**  
941 **X., Dong, J., Zeng, W., Tao, L., Ye, J., Tan, J., Ren, X., Chen, X., He, J., Liu, D., Tian, W., Tian,**  
942 **C., Xia, H., Bao, Q., Li, G., Gao, H., Cao, T., Wang, J., Zhao, W., Li, P., Chen, W., Wang, X.,**  
943 **Zhang, Y., Hu, J., Wang, J., Liu, S., Yang, J., Zhang, G., Xiong, Y., Li, Z., Mao, L., Zhou, C.,**  
944 **Zhu, Z., Chen, R., Hao, B., Zheng, W., Chen, S., Guo, W., Li, G., Liu, S., Tao, M., Wang, J., Zhu,**  
945 **L., Yuan, L., and Yang, H.** (2002). A draft sequence of the rice genome (*Oryza sativa* L. ssp. indica).  
946 *SCIENCE* **296**, 79-92.
- 947 **Zemach, A., McDaniel, I.E., Silva, P., and Zilberman, D.** (2010). Genome-wide evolutionary  
948 analysis of eukaryotic DNA methylation. *SCIENCE* **328**, 916-919.
- 949 **Zhang, H., Lang, Z., and Zhu, J.K.** (2018a). Dynamics and function of DNA methylation in plants.  
950 *Nat Rev Mol Cell Biol* **19**, 489-506.
- 951 **Zhang, H., Lang, Z., and Zhu, J.K.** (2018b). Dynamics and function of DNA methylation in plants.  
952 *Nat Rev Mol Cell Biol* **19**, 489-506.
- 953 **Zhang, H., Zheng, R., Wang, Y., Zhang, Y., Hong, P., Fang, Y., Li, G., and Fang, Y.** (2019). The  
954 effects of *Arabidopsis* genome duplication on the chromatin organization and transcriptional regulation.

955 NUCLEIC ACIDS RES **47**, 7857-7869.  
956 **Zhang, J., Liu, Y., Xia, E.H., Yao, Q.Y., Liu, X.D., and Gao, L.Z.** (2015). Autotetraploid rice  
957 methylome analysis reveals methylation variation of transposable elements and their effects on gene  
958 expression. *Proc Natl Acad Sci U S A* **112**, E7022-E7029.  
959 **Zhang, X., Jeong, M., Huang, X., Wang, X.Q., Wang, X., Zhou, W., Shamim, M.S., Gore, H.,**  
960 **Himadewi, P., Liu, Y., Bochkov, I.D., Reyes, J., Doty, M., Huang, Y.H., Jung, H., Heikamp, E.,**  
961 **Aiden, A.P., Li, W., Su, J., Aiden, E.L., and Goodell, M.A.** (2020). Large DNA Methylation Nadirs  
962 Anchor Chromatin Loops Maintaining Hematopoietic Stem Cell Identity. *MOL CELL* **78**, 506-521.  
963 **Zhao, W., Wang, J., He, X., Huang, X., Jiao, Y., Dai, M., Wei, S., Fu, J., Chen, Y., Ren, X., Zhang,**  
964 **Y., Ni, P., Zhang, J., Li, S., Wang, J., Wong, G.K., Zhao, H., Yu, J., Yang, H., and Wang, J.**  
965 (2004). BGI-RIS: an integrated information resource and comparative analysis workbench for rice  
966 genomics. *NUCLEIC ACIDS RES* **32**, D377-D382.  
967 **Zhou, Q., Lim, J.Q., Sung, W.K., and Li, G.** (2019a). An integrated package for bisulfite DNA  
968 methylation data analysis with Indel-sensitive mapping. *BMC BIOINFORMATICS* **20**, 47.  
969 **Zhou, Q., Lim, J.Q., Sung, W.K., and Li, G.** (2019b). An integrated package for bisulfite DNA  
970 methylation data analysis with Indel-sensitive mapping. *BMC BIOINFORMATICS* **20**, 47.  
971  
972

973 **Figure 1**

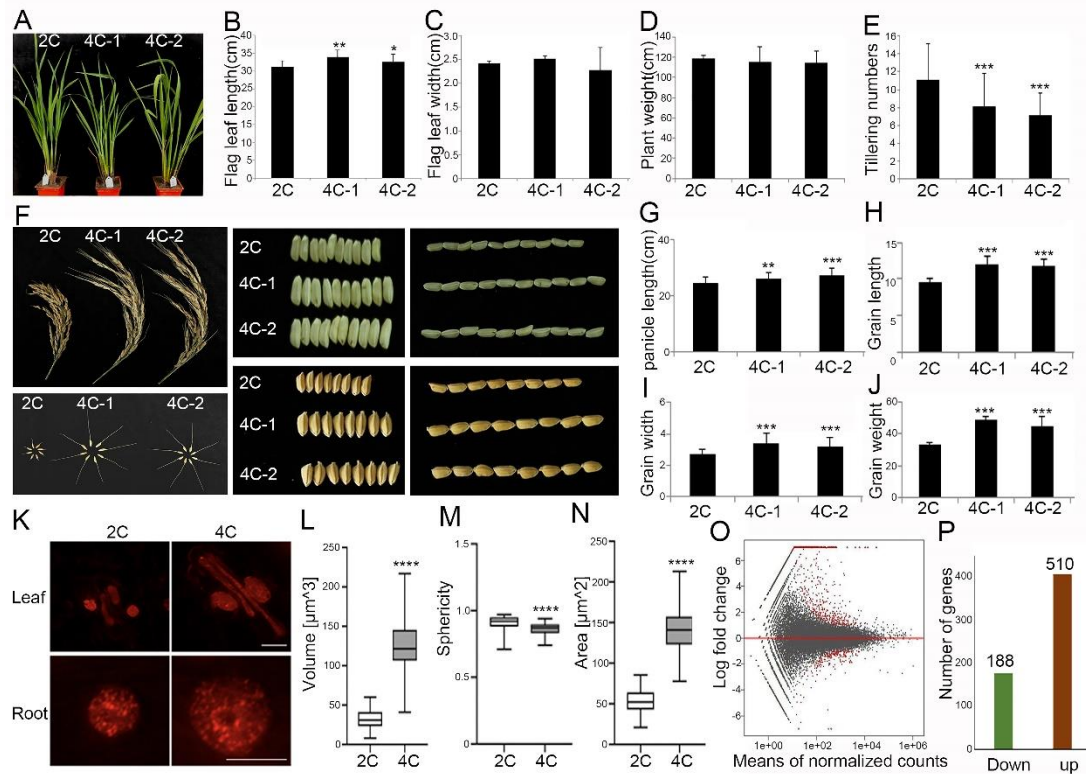

974

975 **Figure 1 Comparisons of morphology and transcriptome between diploid**  
 976 **(2×9311) and autotetraploid rice (4×9311).**

977 **A**, Seedling morphology of diploid and autotetraploid rice. **B-E**, Flag leaf length  
 978 (B), flag leaf width (C), plant weight (D), and tillering numbers (E) of diploid and  
 979 autotetraploid rice seedlings. Error bars represent means ± SEM (standard  
 980 error of mean, n = 3 biological replicates). Statistical significance was analyzed  
 981 by *t*-test, \*\*\**p* < 0.001. **F**, Panicle and grain morphology of diploid and  
 982 autotetraploid rice. **G-J**, Panicle length (G), grain length (H), grain width (I),  
 983 and grain weight (J) of diploid and autotetraploid rice plants. Error bars  
 984 represent means ± SEM (standard error of mean, n = 3 biological replicates).  
 985 Statistical significance was analyzed by *t*-test, \*\*\**p* < 0.001. **K**, Nuclei of guard  
 986 cells and root cells of diploid and autotetraploid rice stained by DAPI. **L-N**,  
 987 Volume (L), sphericity (M), and area (N) of diploid and autotetraploid rice nuclei.  
 988 Error bars represent means ± SEM (standard error of mean, n = 3 biological  
 989 replicates). Statistical significance was analyzed by *t*-test, \*\*\**p* < 0.001. **O**, MA  
 990 plot for statistical significance against gene fold change between diploid and

991 autotetraploid rice. Each gene was marked as a dot. Red dots above 0  
992 represent up-regulated genes, red dots below 0 represent down-regulated  
993 genes and black dots represent the other genes. **P**, Numbers of up- and  
994 down-regulated genes ( $|\log_2\text{fold change}| > 1$ ) between diploid and  
995 autotetraploid rice seedlings. The data from three biological replicates were  
996 combined.  
997  
998

999 **Figure 2**

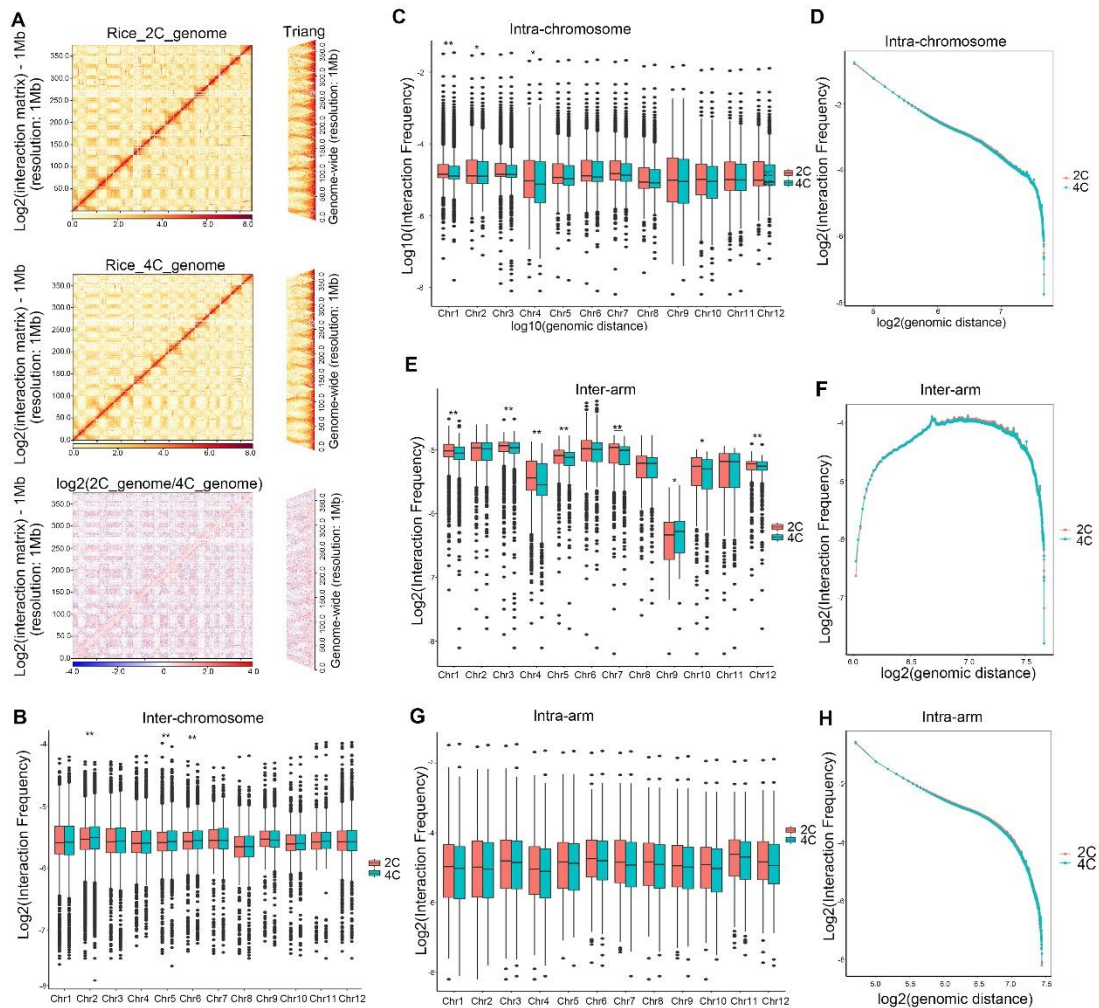

1000

1001

**Figure 2 Rice genome doubling weakens the chromatin interactions.**

1002

**A**, Chromatin interaction heatmaps of 2C and 4C rice, and differential chromatin interaction heatmap between 2C and 4C rice at a 1M resolution. Chromosomes stacked from bottom left to up right were chr1, chr2, chr3, chr4

1003

chr5. **B**, Boxplots showing inter-chromosome interaction frequencies among

1004

all chromosome pairs. **C**, Boxplots showing intra-chromosome interaction frequencies between 2C and 4C rice. **D**, Interaction decay exponents of

1005

intra-chromosome interactions. **E**, Boxplots showing inter-arm interaction frequencies between 2C and 4C rice. Inter-arm interactions are the

1006

interactions with both sides inside one chromosome, but from different arms of the same chromosome. **F**, Interaction decay exponents of inter-arm

1007

interactions. **G**, Boxplots showing intra-arm interaction frequencies between 2C and 4C rice. **H**, Interaction decay exponents of intra-chromosome arm.

1008

interactions. **E**, Boxplots showing inter-arm interaction frequencies between 2C and 4C rice. Inter-arm interactions are the

1009

interactions with both sides inside one chromosome, but from different arms of the same chromosome. **F**, Interaction decay exponents of inter-arm

1010

interactions. **G**, Boxplots showing intra-arm interaction frequencies between 2C and 4C rice. **H**, Interaction decay exponents of intra-chromosome arm.

1011

interactions. **G**, Boxplots showing intra-arm interaction frequencies between 2C and 4C rice. **H**, Interaction decay exponents of intra-chromosome arm.

1012

interactions. **G**, Boxplots showing intra-arm interaction frequencies between 2C and 4C rice. **H**, Interaction decay exponents of intra-chromosome arm.

1013

interactions. **G**, Boxplots showing intra-arm interaction frequencies between 2C and 4C rice. **H**, Interaction decay exponents of intra-chromosome arm.

1014 (\*\* $p < 0.001$ , \*\* $p < 0.01$ , \* $p < 0.05$ , NS  $p > 0.05$ . The  $p$  values were tested by  
1015 Wilcoxon–Mann–Whitney test).  
1016

1017

1018 **Figure 3**

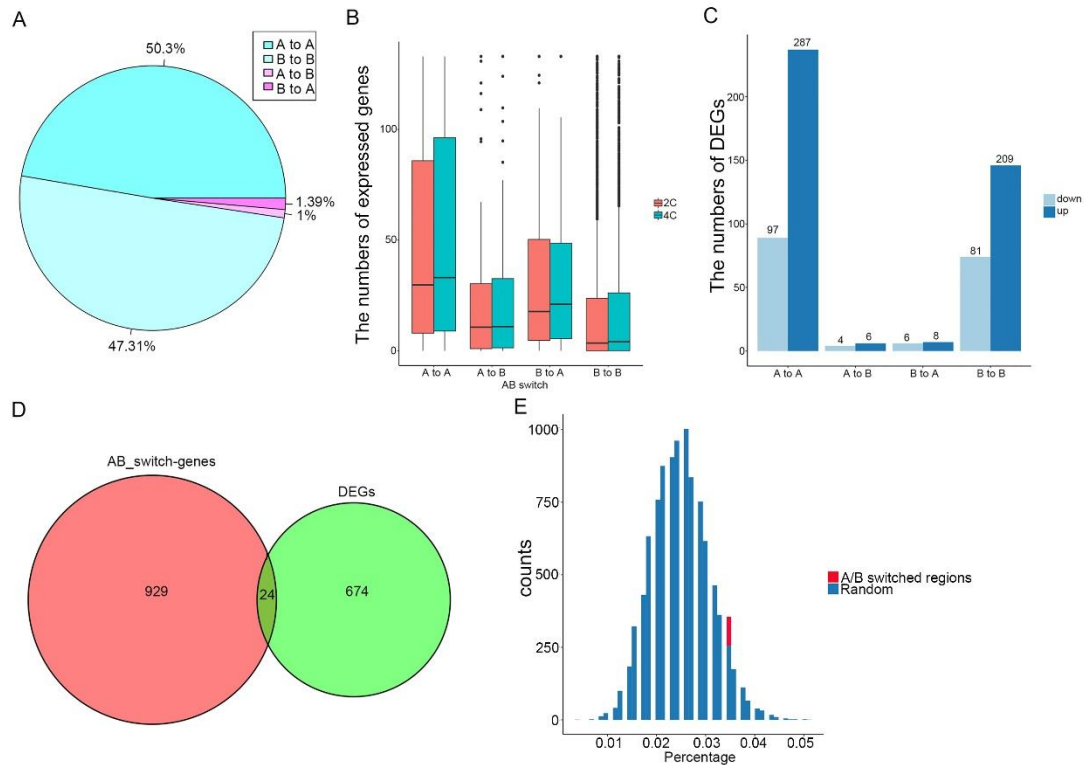

1019

1020 **Figure 3 The changed chromatin compartments are uncorrelated with the**  
 1021 **gene expression.**

1022 **A**, Pie chart representing the percentages of chromatin compartment switches  
 1023 between 2C and 4C rice. **B**, Boxplots showing the numbers of protein-coding  
 1024 genes in A/B compartments between 2C and 4C rice. **C**, Bar graph showing  
 1025 the statistics of DEGs in the switches of compartments A/B. **D**, Venn diagram  
 1026 showing the numbers of genes in compartment A/B switched regions (pink)  
 1027 and DEGs (green) between 2C and 4C rice. **E**, Histogram of randomly  
 1028 selected DEGs in AB switch regions (n=10000). The red bar chart shows the  
 1029 true AB switch genes in DEGs, and the blue chart shows randomly selected  
 1030 genes with the same number of DEGs overlapped with switched AB  
 1031 compartments. X-coordinate shows proportion of different genes associated  
 1032 with AB switches.

1033



1034 **Figure 4**

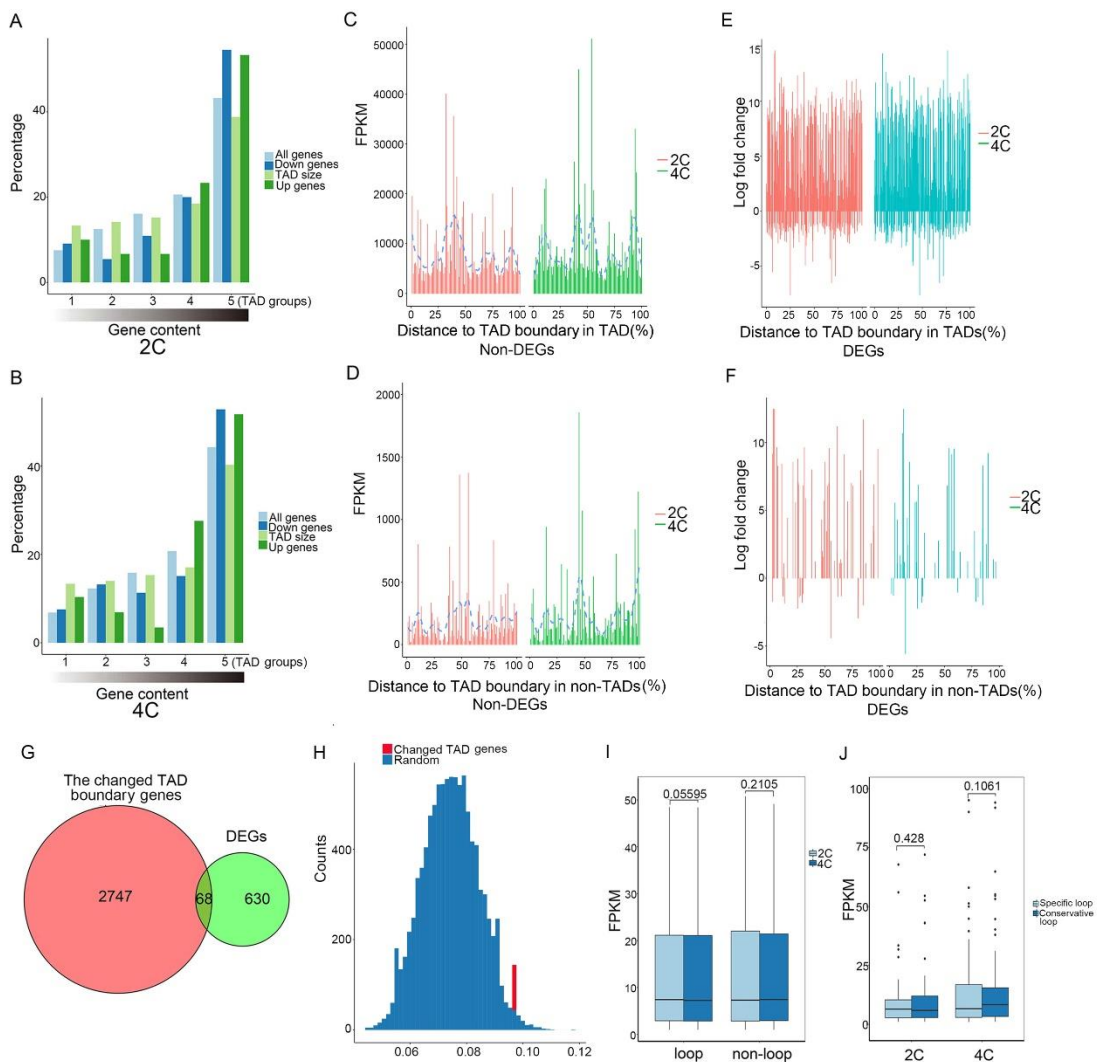

1035

1036 **Figure 4 TADs and loops are uncorrelated with gene expression.**

1037 **A and B**, Percentages of genes compared with the percentages of DEGs in 2C  
 1038 rice (A) and 4C rice (B) in TADs grouped by the number of overlapping genes  
 1039 (gene content). The ranking on the x-axis is such that the leftmost group  
 1040 contains 20 % TADs with the lowest number of genes and the rightmost group  
 1041 contains 20 % TADs with the highest number of genes. **C**, Bar plots showing  
 1042 the distance distribution of non-DEGs from the TAD boundary in TADs.  
 1043 X-coordinate shows the percentage from the TSS of genes to the left boundary  
 1044 of TADs, 0 represents the left boundary of TADs, 100 represents the right  
 1045 boundary of TADs, and y-coordinate shows the gene expression. **D**, Bar plots  
 1046 showing the distance distribution of non-DEGs from the TAD boundary in

1047 non-TADs. X-coordinate shows the percentage from the TSS of genes to the  
1048 TAD boundary, and y-coordinate shows the gene expression. **E**, Bar plots  
1049 showing the distance distribution of DEGs from the TAD boundary in TADs.  
1050 X-coordinate shows the percentage from the TSS of genes to the TAD  
1051 boundary, and y-coordinate shows the log fold change of DEGs. **F**, Bar plots  
1052 showing the distance distribution of DEGs from the TAD boundary in  
1053 non-TADs. X-coordinate shows the percentage from the TSS of genes to the  
1054 TAD boundary, and y-coordinate shows the log fold change of DEGs.  
1055 Non-TAD indicates the regions in the genome except TADs. **G**, Venn diagrams  
1056 showing numbers of genes in changed TADs (pink) and DEGs (green)  
1057 between 2C and 4C rice. **H**, Histogram of randomly selected DEGs in TAD  
1058 changed regions (n=10000). The red bar chart shows the true TAD changed  
1059 genes in DEGs, and the blue chart shows the TAD changed genes in random  
1060 number of DEGs. X-coordinate shows proportion of different genes associated  
1061 with TAD changed. TAD changed means that a gene goes from TAD to  
1062 non-TAD, or non-TAD to TAD, after chromosome doubling. **I**, Boxplots  
1063 showing the normalized RNA-seq FPKMs between genes in loops and  
1064 non-loops in 2C and 4C rice. **J**, Boxplots showing the normalized RNA-seq  
1065 FPKMs of genes in specific loops and conservative loops in 2C and 4C rice.  
1066 Specific loops indicate loops unique to 2C or 4C, conservative loops indicate  
1067 loops shared by 2C and 4C.

1068

1069 **Figure 5**

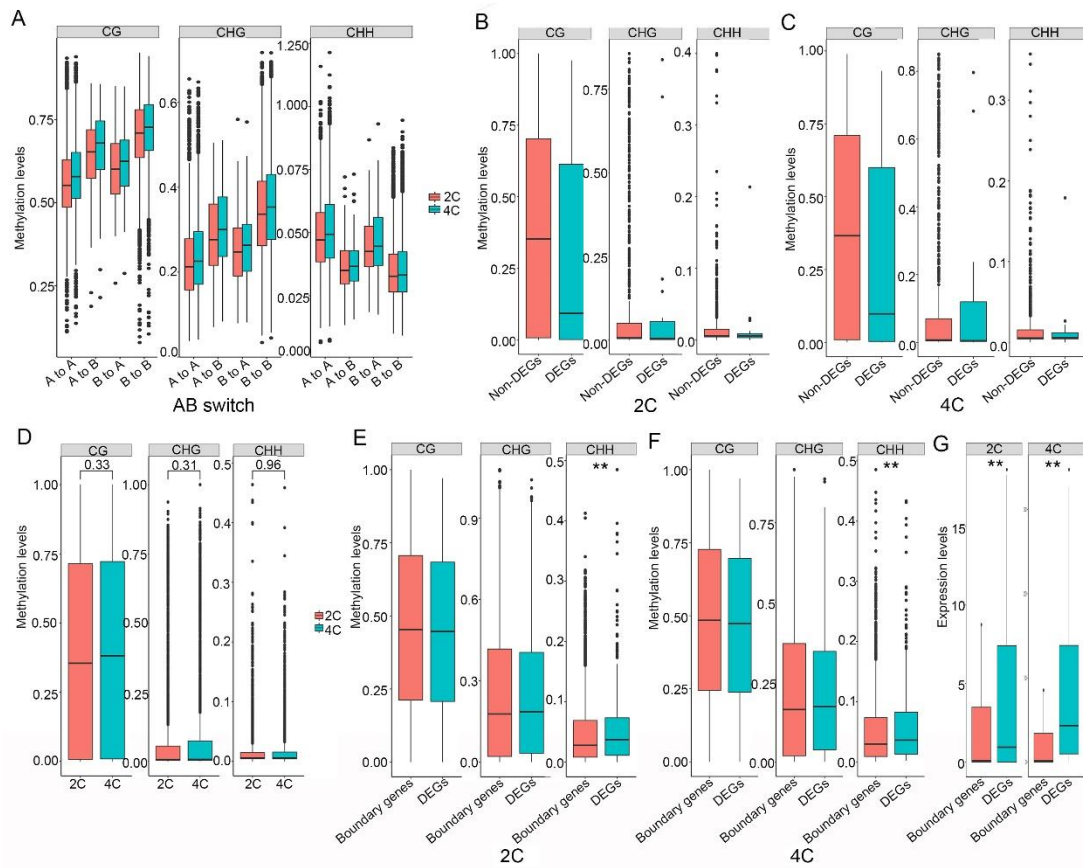

1070

1071 **Figure 5 The DNA methylation levels show no changes between DEGs**  
 1072 **and non-DEGs or between 2C and 4C rice in the compartment A/B**  
 1073 **switched regions.**

1074 **A,** Comparisons of CG, CHG and CHH methylation levels in 4 kb upstream of  
 1075 genes in the compartment A/B switches between 2C and 4C rice. **B,**  
 1076 Comparisons of CG, CHG and CHH methylation levels in 4 kb upstream of  
 1077 DEGs with non-DEGs in the compartment A/B switches of 2C rice. **C,**  
 1078 Comparison of methylation levels of CG, CHG and CHH contexts in 4 kb  
 1079 upstream of DEGs with non-DEGs in the compartment A/B switches of 4C rice.  
 1080 **D,** Comparison of CG, CHG and CHH methylation levels in 4 kb upstream of  
 1081 TAD boundary genes (3247) between 2C and 4C rice. **E,** Comparison of CG,  
 1082 CHG and CHH methylation levels between TAD boundary genes and DEGs in  
 1083 2C rice. **F,** Comparison of CG, CHG and CHH methylation levels between 4 kb  
 1084 upstream of TAD boundary genes and DEGs in 4C rice. \**p* value < 0.05; \*\**p*  
 1085 value < 0.01. **G,** Boxplots showing FPKMs between TAD boundary genes and

1086 DEGs in 2C and 4C rice. The  $p$  values were tested by Wilcoxon–Mann–  
1087 Whitney test.

1088 **Figure 6**

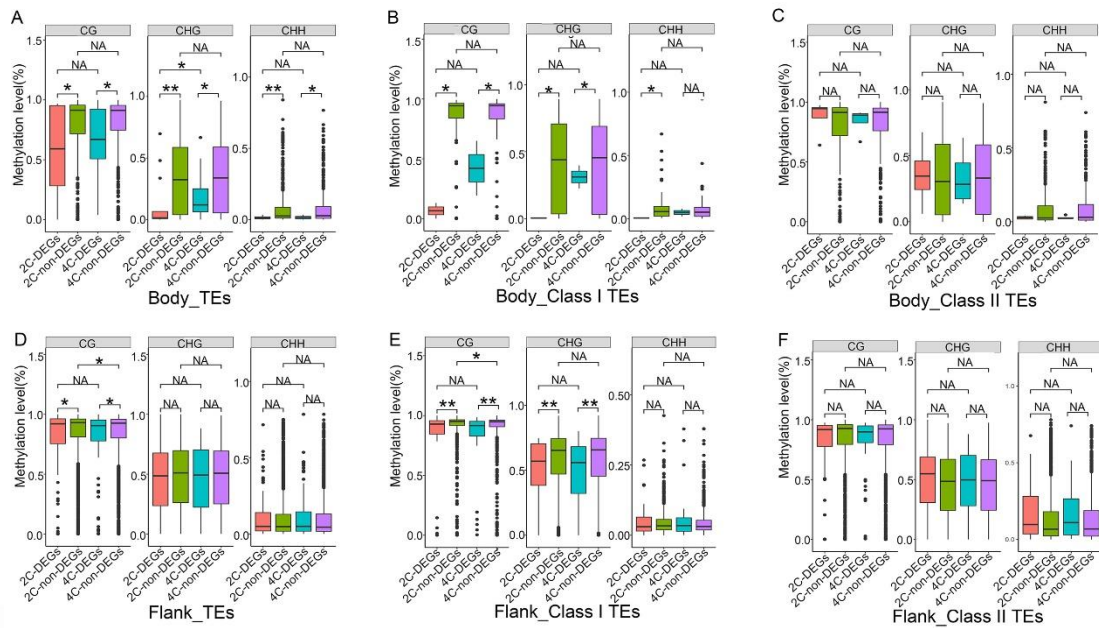

1089

1090 **Figure 6 TEs in bodies of non-DEGs or regions flanking non-DEGs in**  
 1091 **compartment A/B switched regions are hypermethylated compared to**  
 1092 **those of DEGs in 2C and 4C rice.**

1093 **A**, Comparison of TE methylation levels in gene bodies between non-DEGs  
 1094 and DEGs in compartments A/B switched regions of 2C and 4C rice. **B**,  
 1095 Comparison of Class I TE methylation levels in gene bodies between  
 1096 non-DEGs and DEGs in compartments A/B switched regions of 2C and 4C rice.  
 1097 **C**, Comparison of Class II TE methylation levels in gene bodies between  
 1098 non-DEGs and DEGs in compartments A/B switched regions of 2C and 4C rice.  
 1099 **D**, Comparison of TE methylation levels in regions flanking genes between  
 1100 non-DEGs and DEGs in compartments A/B switched regions of 2C and 4C rice.  
 1101 **E**, Comparison of Class I TE methylation levels in regions flanking genes  
 1102 between non-DEGs and DEGs in compartments A/B switched regions of 2C  
 1103 and 4C rice. **F**, Comparison of Class II TE methylation levels in regions  
 1104 flanking genes between non-DEGs and DEGs in compartments A/B switched  
 1105 regions of 2C and 4C rice. (Class I is retrotransposons including Copia, Gypsy,  
 1106 LTR, LINE and SINE, and class II is transposons including Helitron, Stowaway,  
 1107 DNA, Harbinger, MULE\_MuDR and hAT).

1108 **Figure 7**

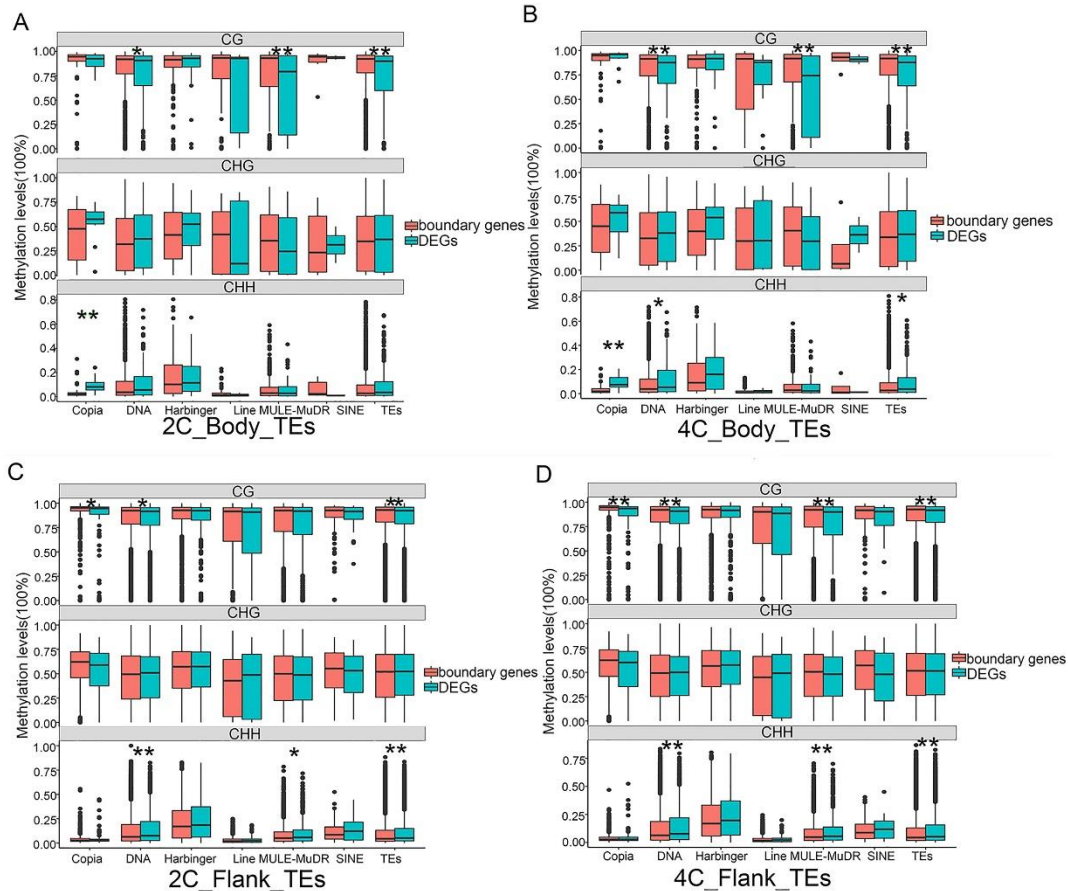

1109

1110 **Figure 7 TEs across non-DEGs in TAD boundaries are hypermethylated**  
 1111 **compared to those across DEGs in 2C and 4C rice.**

1112 **A**, Comparison of TE methylation levels in gene bodies between TAD  
 1113 boundary genes and DEGs in 2C rice. **B**, Comparison of TE methylation levels  
 1114 in gene bodies between TAD boundary genes and DEGs in 4C rice. **C**,  
 1115 Comparison of TE methylation levels in regions flanking genes between TAD  
 1116 boundary genes and DEGs in 2C rice. **D**, Comparison of TE methylation levels  
 1117 in regions flanking genes between TAD boundary genes and DEGs in 4C rice.  
 1118 (“flanking” represents the 4 kb regions flanking genes).

1119



1120 **Figure 8**

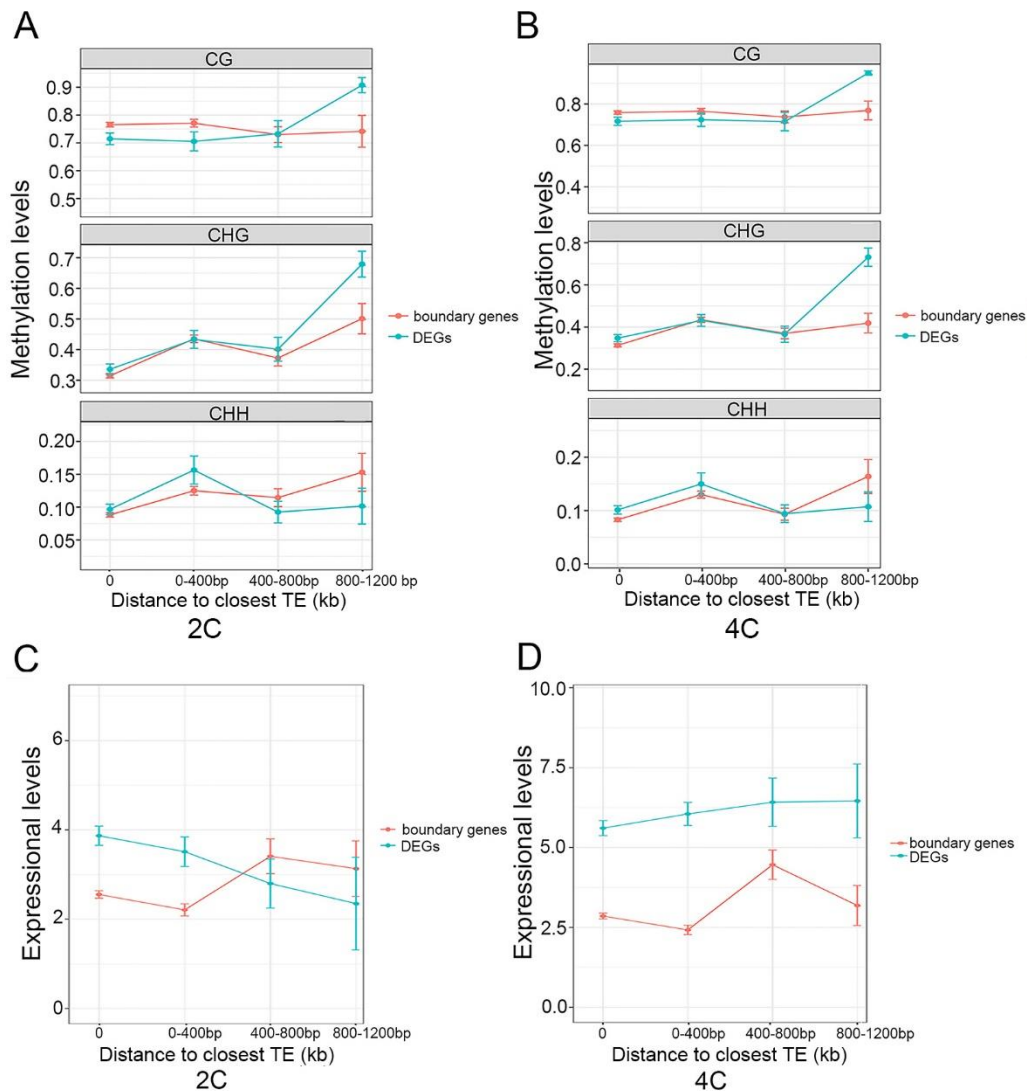

1121

1122 **Figure 8 The distances from TEs to genes are related to the expression**  
 1123 **levels of these genes.**

1124 **A**, Comparison of TE methylation levels related to the distance to the closest  
 1125 TE between TAD boundary genes and DEGs in 2C rice. **B**, Comparison of TE  
 1126 methylation levels related to the distance to the closest TE between TAD  
 1127 boundary genes and DEGs in 4C rice. “0” indicates genes overlapped with TEs  
 1128 in body regions. Error bars indicate SEMs. **C**, Comparison of gene expression  
 1129 levels related to the distance to the closest TE between TAD boundary genes  
 1130 and DEGs in 2C rice. **D**, Comparison of gene expression levels related to the  
 1131 distance to the closest TE between TAD boundary genes and DEGs in 4C rice.

1132
